# Supplementary material for: Asymmetric synthesis of carbocycles: use of intramolecular conjugate displacement
Source: Royal Society of Chemistry journal article supplement (doi:10.1039/c3ob40115d), 2013-01-01
Supplement: c3ob40115d_3.pdf [file c3ob40115d_3.pdf]

## SUPPLEMENTARY INFORMATION (PART 3)

### **Asymmetric synthesis of carbocycles: use of intramolecular conjugate displacement**

Dinesh T. Sreedharan and Derrick L. J. Clive\*

*Chemistry Department, University of Alberta, Edmonton, Alberta T6G 2G2, Canada*

*derrick.clive@ualberta.ca*

|                                                      |      |
|------------------------------------------------------|------|
| NMR spectra of compound <b>9g</b>                    | S163 |
| NMR spectra of compound <b>10a</b>                   | S165 |
| NMR spectra of compound <b>10a'</b>                  | S167 |
| NMR spectra of compound <b>10b</b>                   | S169 |
| NMR spectra of compound <b>10b'</b>                  | S171 |
| NMR spectra of compound <b>10c</b>                   | S173 |
| NMR spectra of compound <b>10c'</b>                  | S175 |
| NMR spectra of compound <b>11</b>                    | S177 |
| NMR spectra of compound <b>11a</b>                   | S179 |
| NMR spectra of compound <b>11b</b>                   | S181 |
| NMR spectra of compound <b>11c</b>                   | S183 |
| NMR spectra of compound <b>12</b>                    | S185 |
| NMR spectra of compound <b>12a</b>                   | S187 |
| NMR spectra of compound <b>12b</b>                   | S189 |
| NMR spectra of compound <b>13</b>                    | S191 |
| NMR spectra of compound <b>13b</b>                   | S193 |
| NMR spectra of compound <b>13b'</b>                  | S195 |
| NMR spectra of compound <b>14</b>                    | S197 |
| NMR spectra of compound <b>15 less polar isomer</b>  | S199 |
| NMR spectra of compound <b>15 mixture of isomers</b> | S201 |

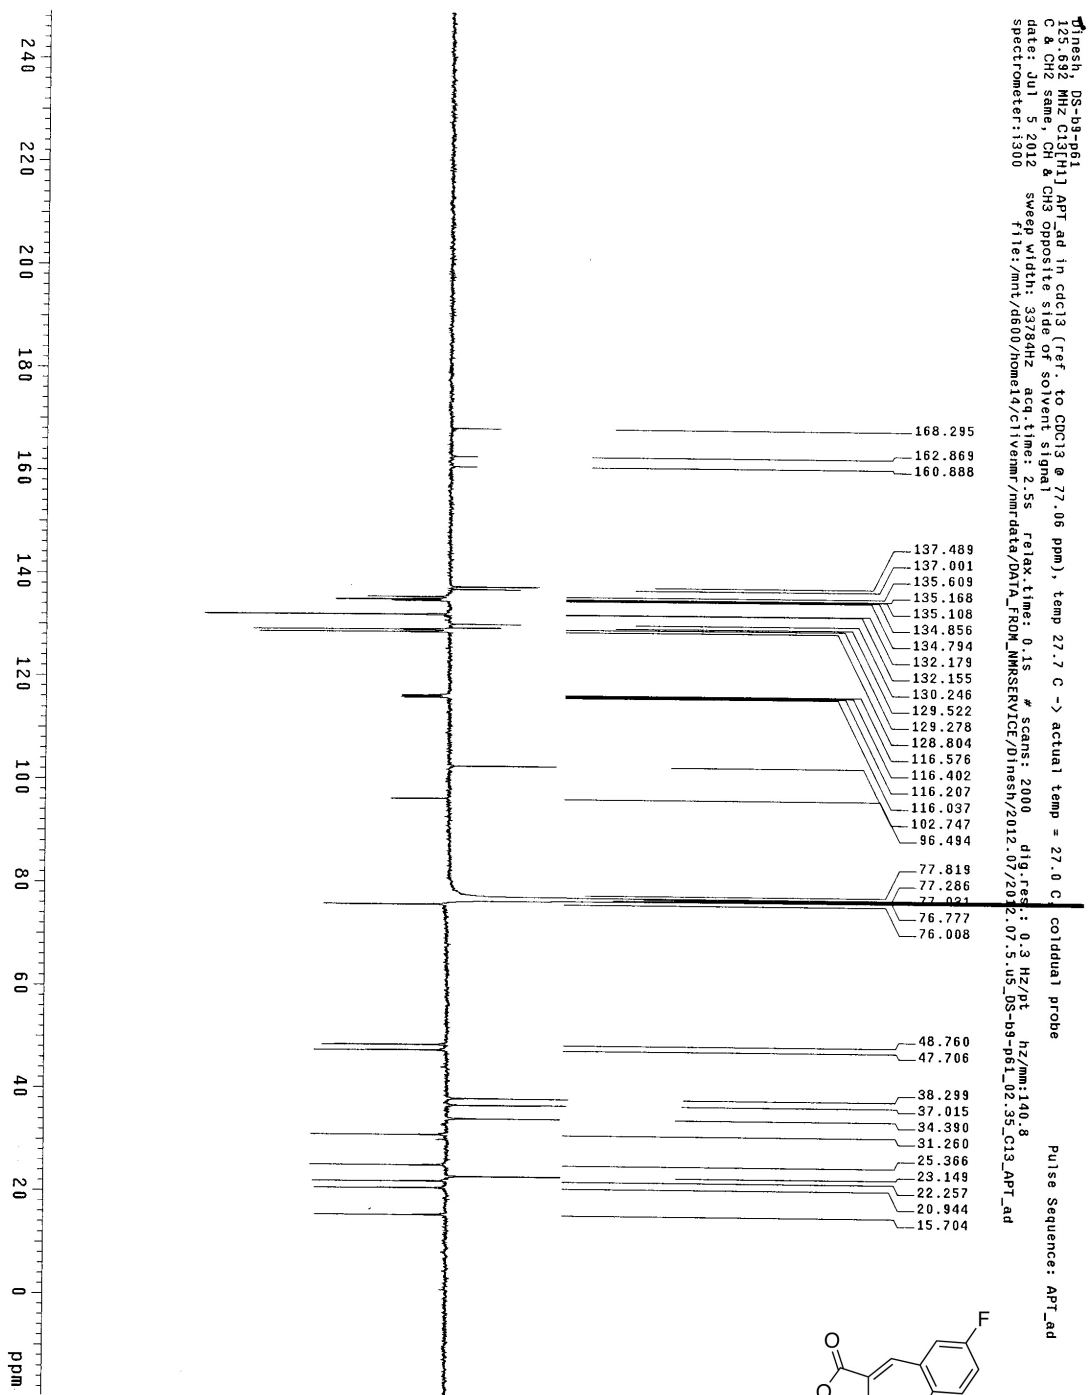

DS-49-P61  
499.122 MHz H1 1D in cdCl3 (ref. to CDCl3 @ 7.26 ppm), temp 27.2 C -> actual temp = 27.0 C, autoxtdb probe

Pulse Sequence: szpu1

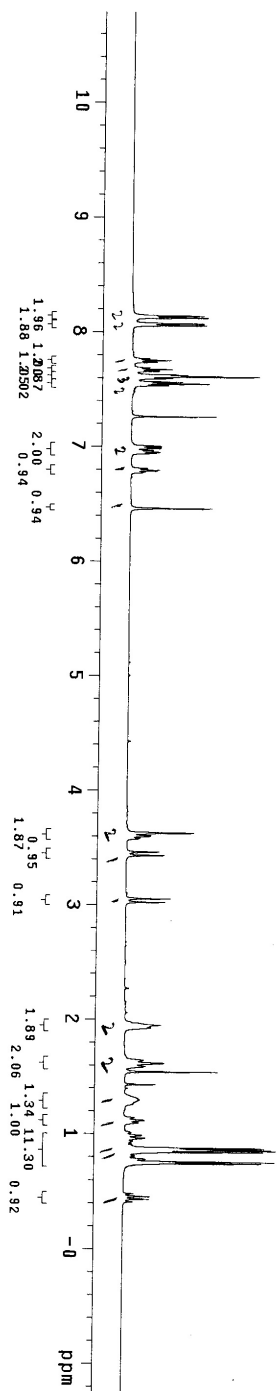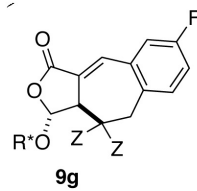

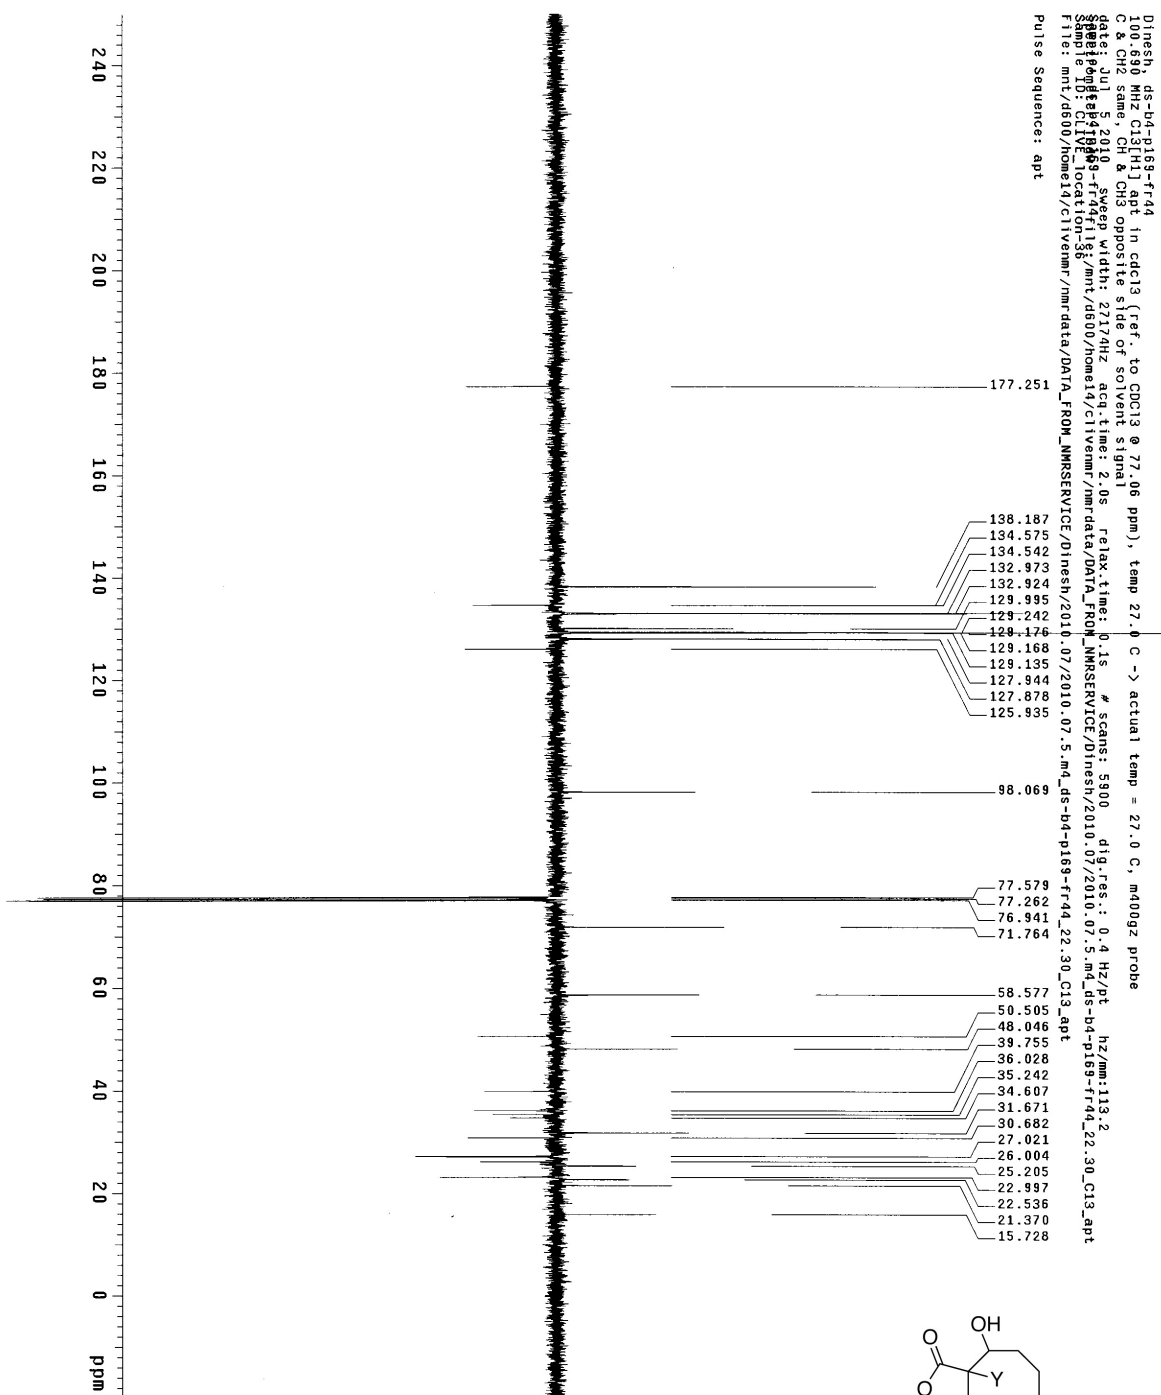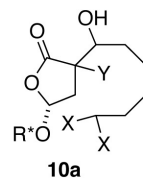

Dinesh; ds-b4-p169-fr44  
400.393 MHz H1 ID in cdcl3 (ref. to CDCl3 @ 7.26 ppm), temp 27.0 C -> actual temp = 27.0 C, m400gz probe  
Sample: ds-b4-p169-fr44  
Sample ID: CLIVE106411  
File: mnt/d600/home14/clivenmr/nmrdata/DATA\_FROM\_NMRSERVICE/Dinesh/2010.07/2010.07.5.m4\_ds-b4-p169-fr44\_22.28\_H1\_ID  
Pulse Sequence: szpu1

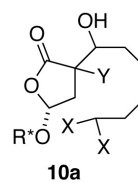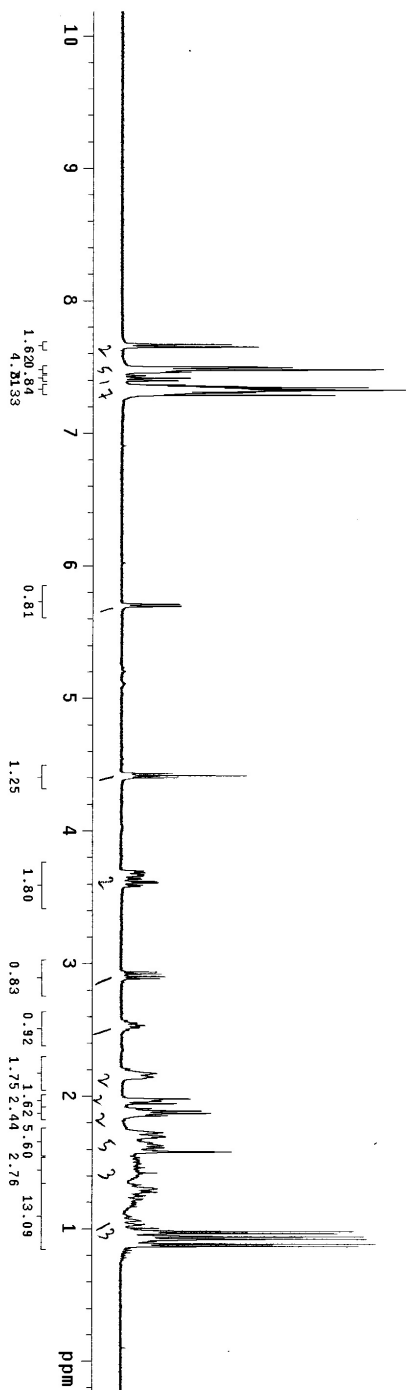

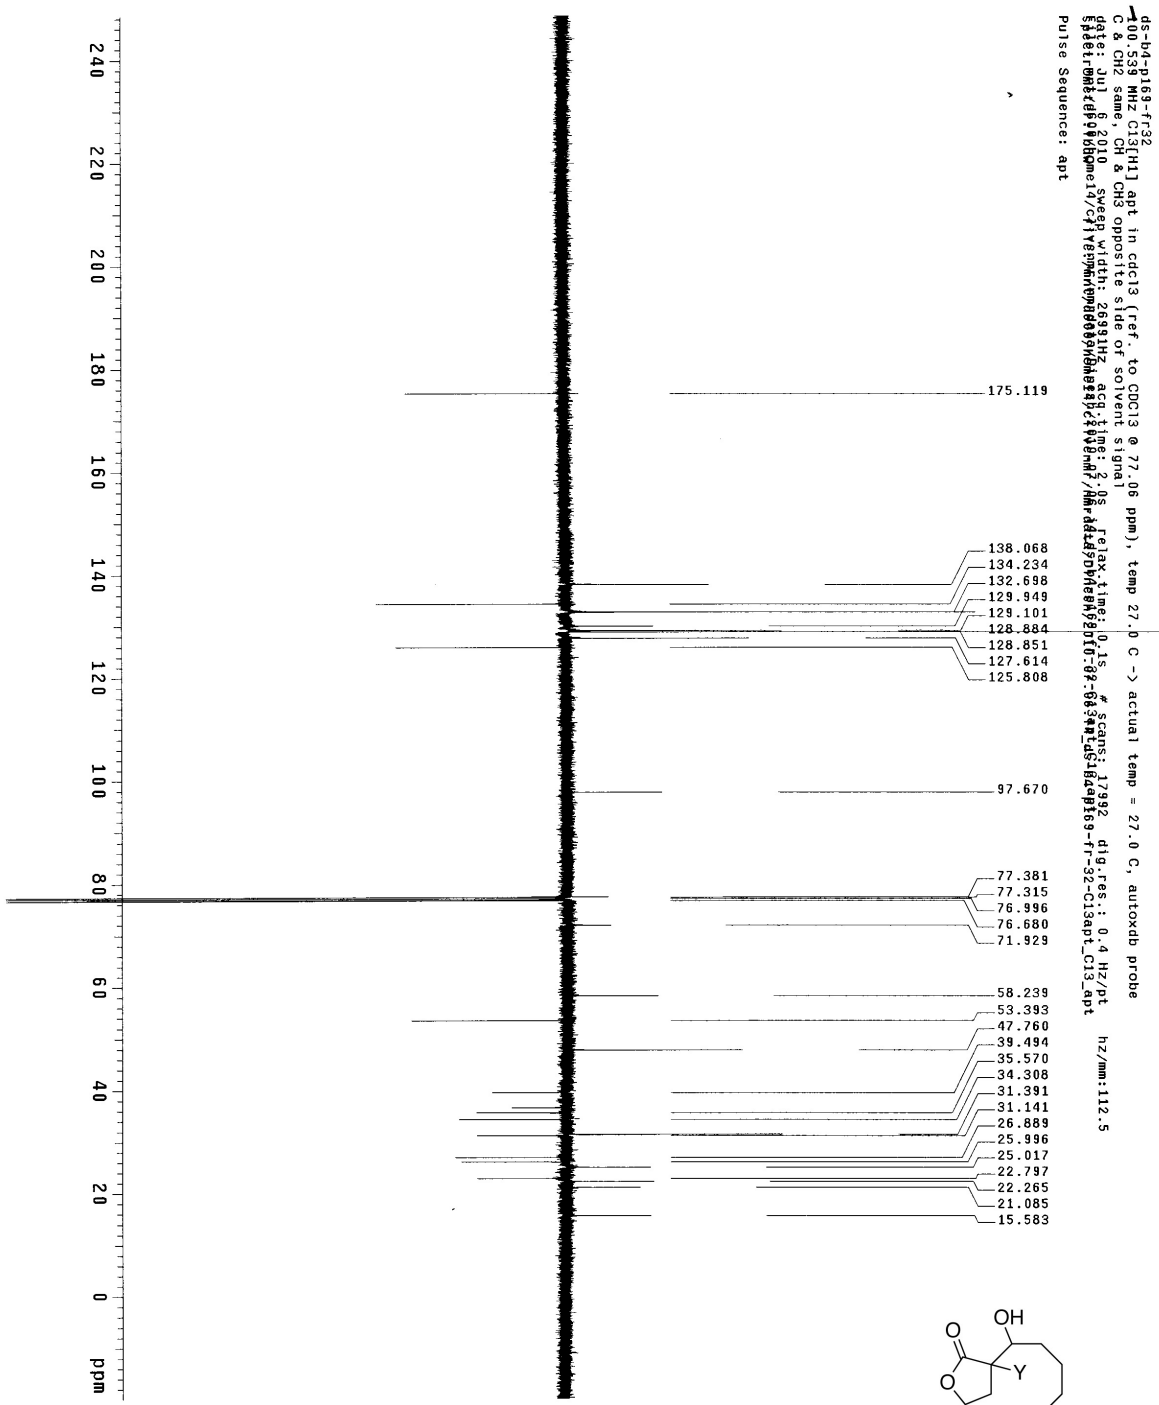

ds-b4-p169-fr32  
100.539 MHz C13[H1] apt in cdcl3 (ref. to CDCl3 @ 77.06 ppm), temp 27.0 C -> actual temp = 27.0 C, autotxnb probe  
C & CH2 same, CH & CH3 opposite side of solvent signal  
Date: Jul 6, 2010 Sweep width: 26931Hz acq. time: 2.08 refax time: 0.15 # scans: 1792 dig.res.: 0.4 Hz/pt  
Spect: dmtdf9166me14/c1ve9mte00009166me14/c1ve9mte00009166me14/10-09-08-3M L4S-B4p169-fr-32-Cl3apt\_C13\_apt  
Pulse Sequence: apt

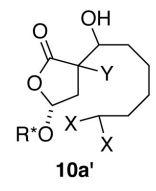

ds-b4-p169-fr32-8nm  
498.122 MHz H1 1D in cdcl3 (ref. to CDCl3 @ 7.26 ppm), temp 27.2 C -> actual temp = 27.0 C, autoxidb probe  
File: mt/d600/home14/ctivemr/nmrdata/01mesh/2010.07.06.15\_ds-b4-p169-fr-32-H1\_1D  
Pulse Sequence: s2pul

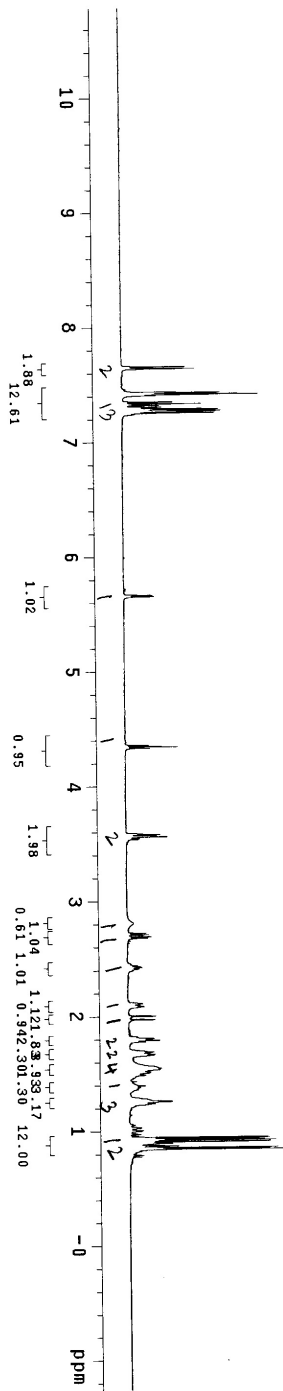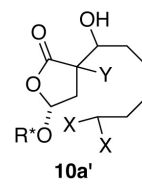

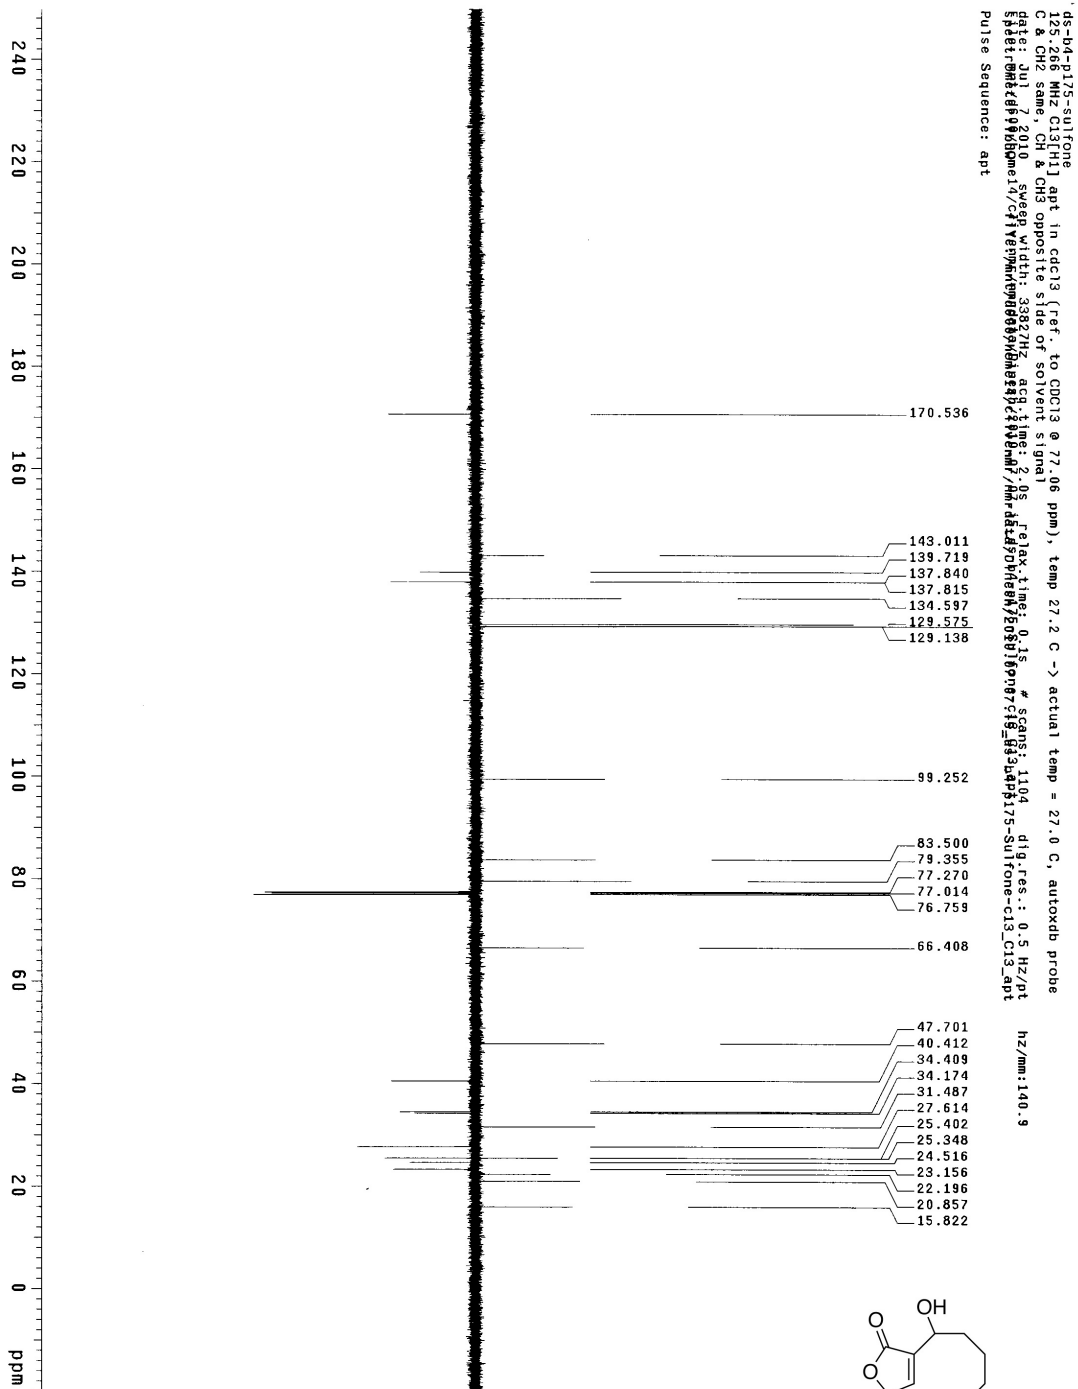

ds-b4-p175-sulfone  
Date: Jul 7 2010  
Pulse Sequence: apt

hz/mm:140.9

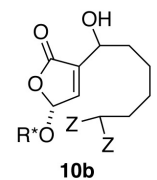



ds-b4-p175-sulfone  
496.122 MHz H1 ID in cdcl3 (ref. to CDCl3 @ 7.26 ppm), temp 27.2 C -> actual temp = 27.0 C, autoxadb probe  
File: mnt/d800/home14/c11vnmr/mmrdata/D1nesh/2010.07.07.15\_ds-b4-p175-Sulfone-H1\_H1\_ID  
Pulse Sequence: s2pul1

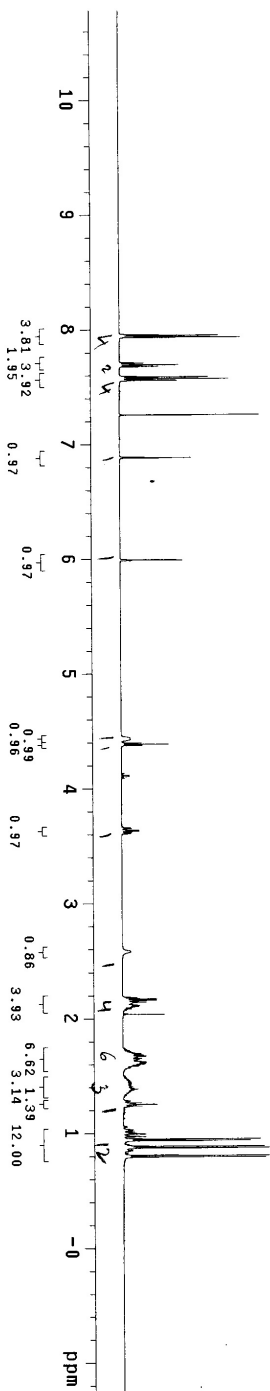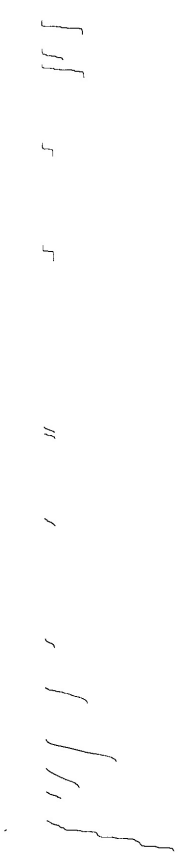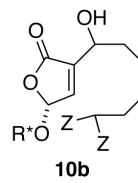

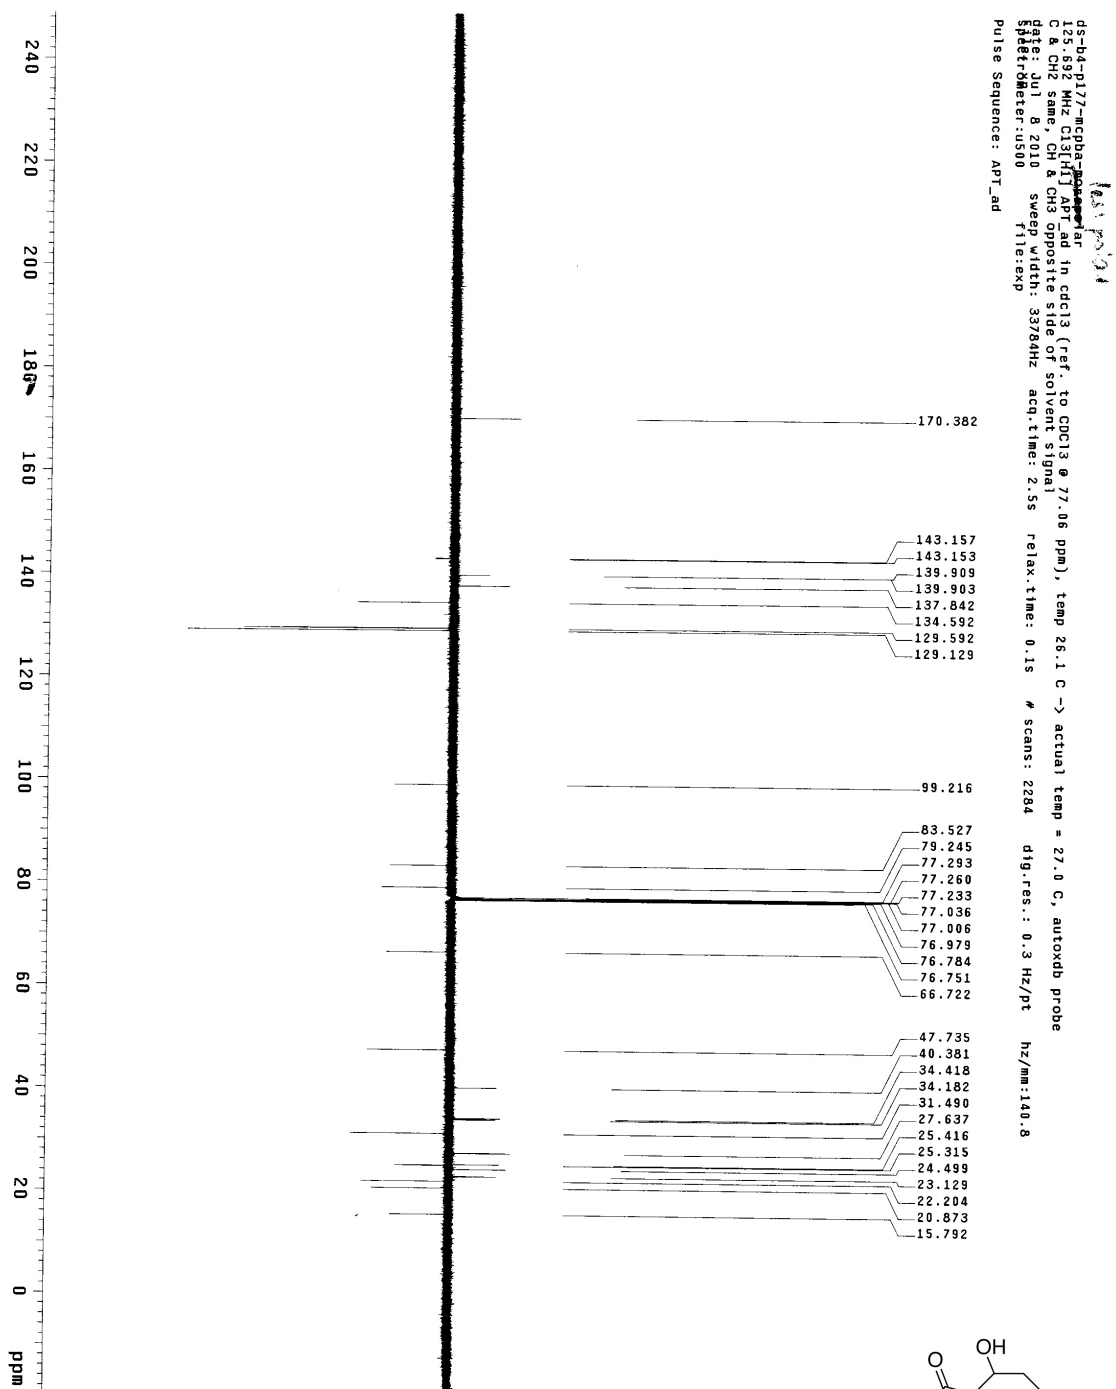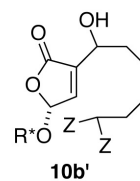

ds-b4-pl77-mcpba-~~proton~~ar  
125.692 MHz C13 N13 APT-ad in cdcl3 (ref. to CDCl3 @ 77.06 ppm), temp 26.1 C -> actual temp = 27.0 C, autotxnb probe  
C & CH2 same, CH & CH3 opposite side of solvent signal!  
Date: Jul 8 2010 sweep width: 33784Hz acq.time: 2.5s relax.time: 0.1s # scans: 2284 dig.res.: 0.3 Hz/pt hz/mm:140.8  
Spectrometer:us00 file:exp  
Pulse Sequence: APT\_ad

ds-b4-p177-mcpba-lesspoliar  
439.815 MHz H1 10 in cdcl3 (ref. to CDCl3 @ 7.26 ppm), temp 26.1 C -> actual temp = 27.0 C, autoxtdb probe  
File: mnt/d600/home14/clivemr/mrdata/Dinesh/2010.07.08.us\_ds-b4-p177-mcpba-lesspoliar-H1\_10  
Pulse Sequence: szpu)

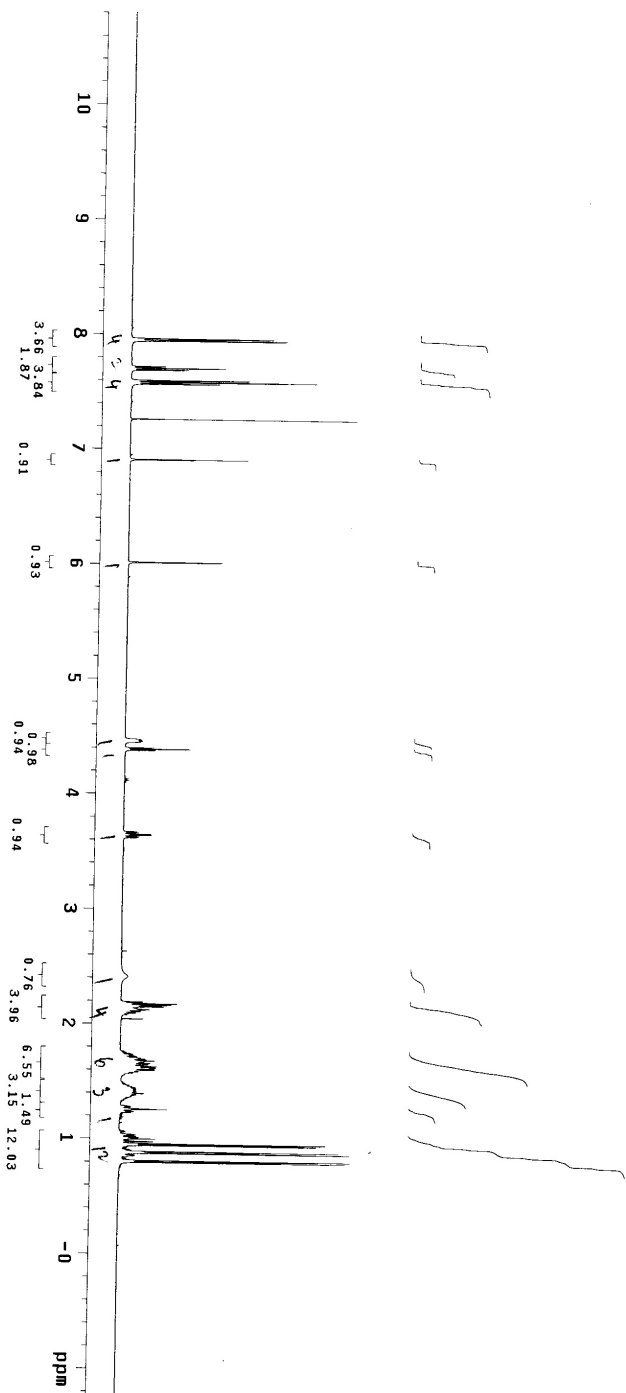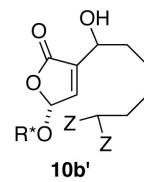

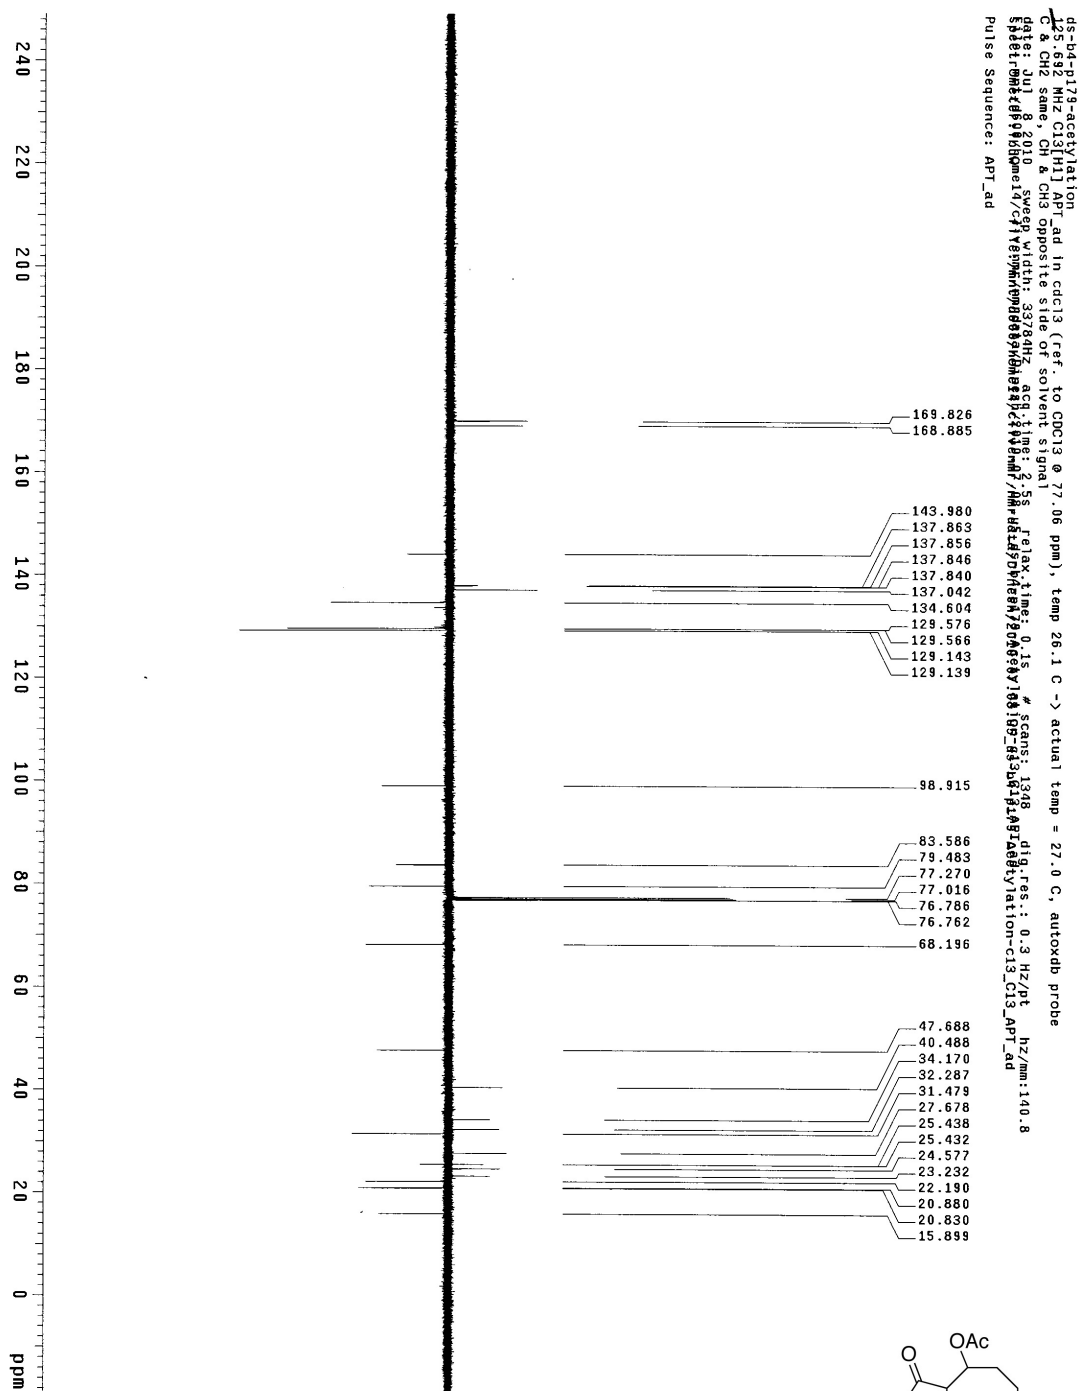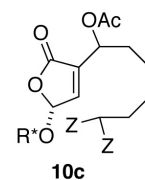

ds-b4-pl79-acetyl)ation  
499.815 MHz H1\_10 in cdcl3 (ref. to CDCl3 @ 7.26 ppm), temp 26.1 C -> actual temp = 27.0 C, autotxdo probe  
File: nnt/d60/home14/ctivenmr/nmrdata/Dinesh/2010.07.08.us\_ds-b4-pl79-acetyl)ation-H1\_10  
Pulse Sequence: s2pu1

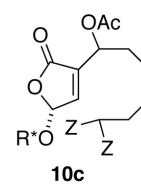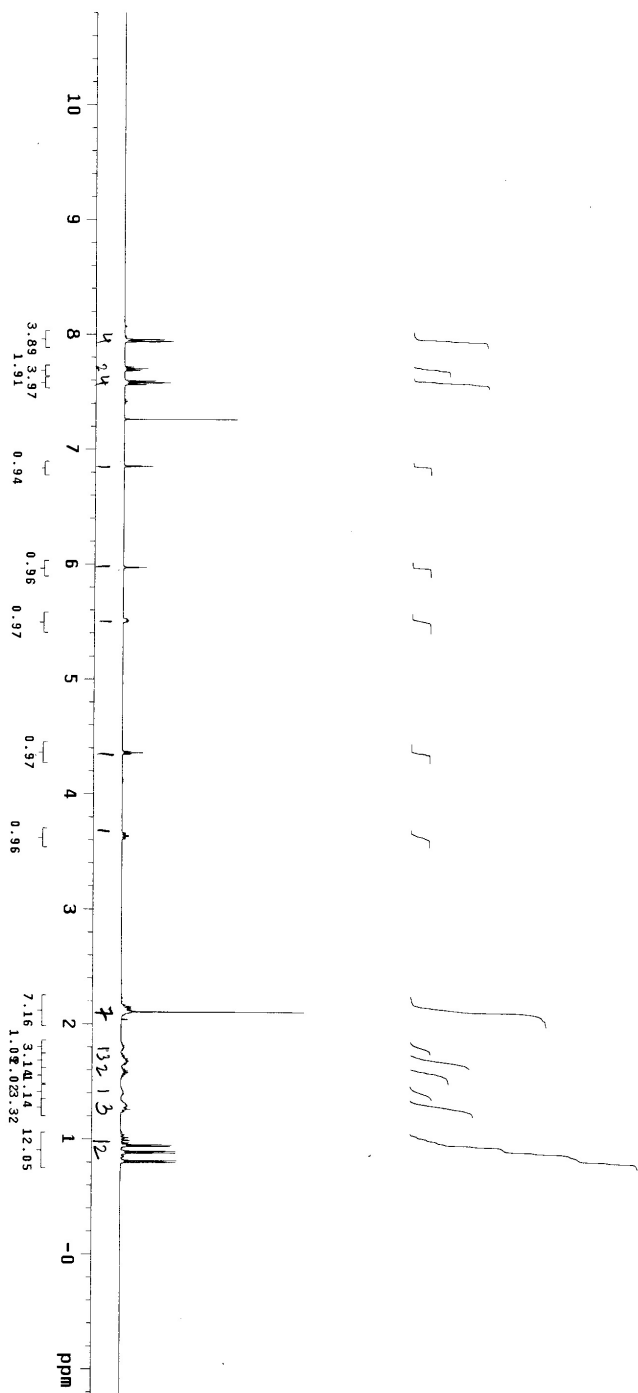

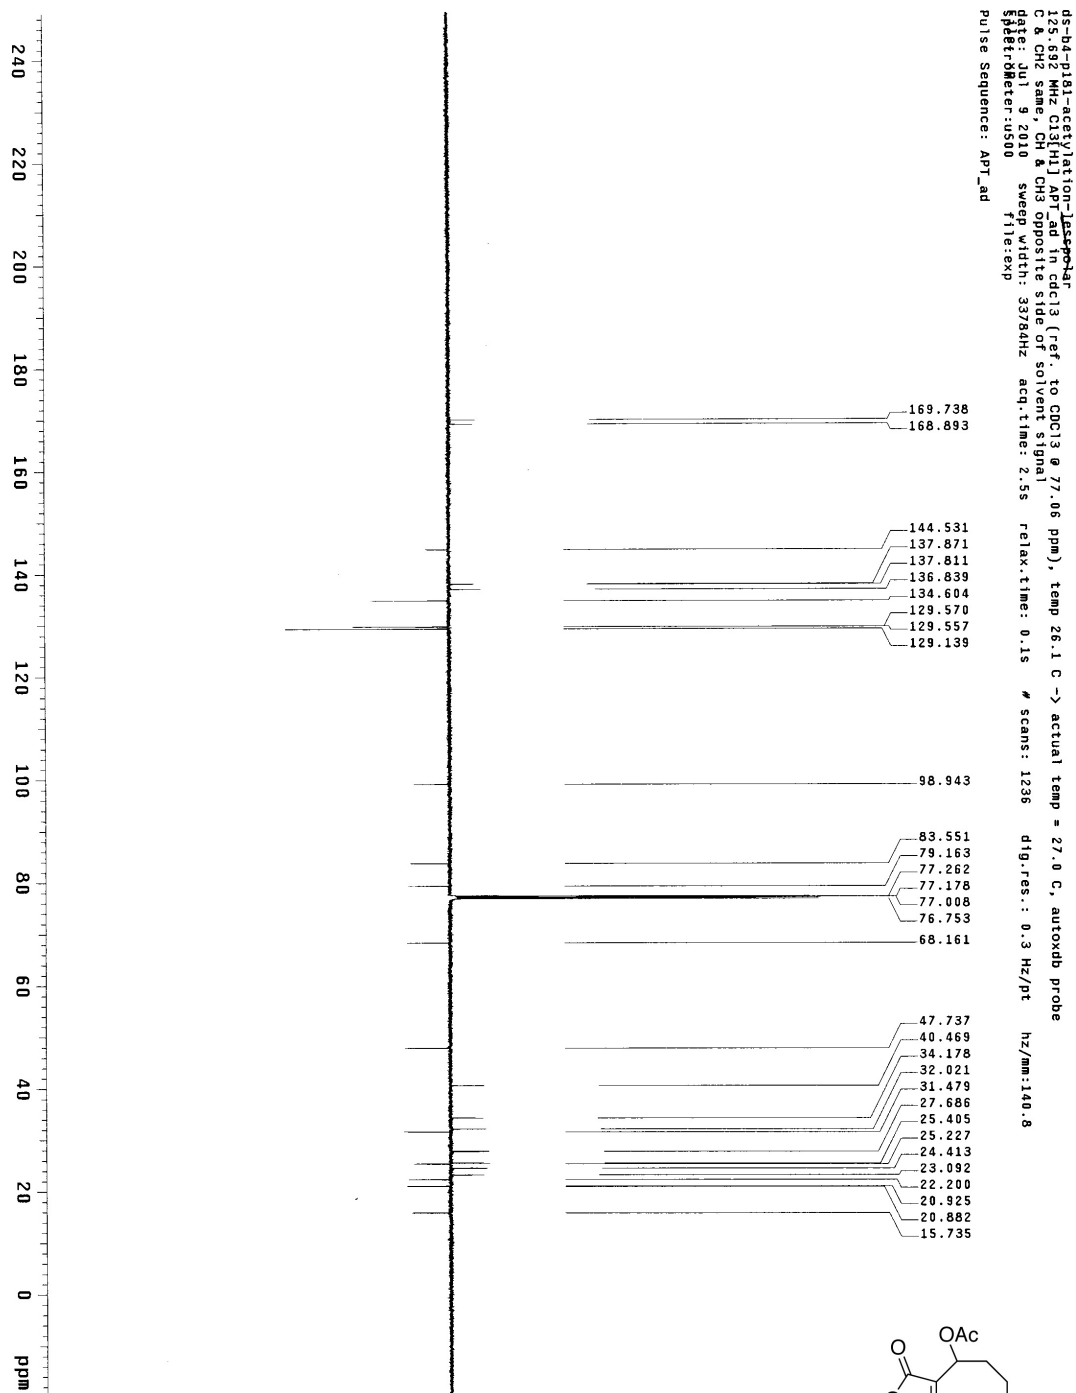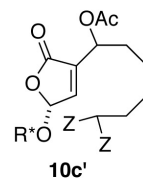

ds-bd-p181-Acetylation-lesspolar-H1  
499.815 MHz H1 ID in cdcl3 (ref. to CDCl3 @ 7.26 ppm), temp 26.1 C -> actual temp = 27.0 C, autotxdb probe  
File: mnt/d600/home4/clivenmr/nmrdata/01nesh/2010\_07\_09\_US\_ds-bd-p181-acetylation-lesspolar-H1\_H1\_ID  
Pulse Sequence: szpul

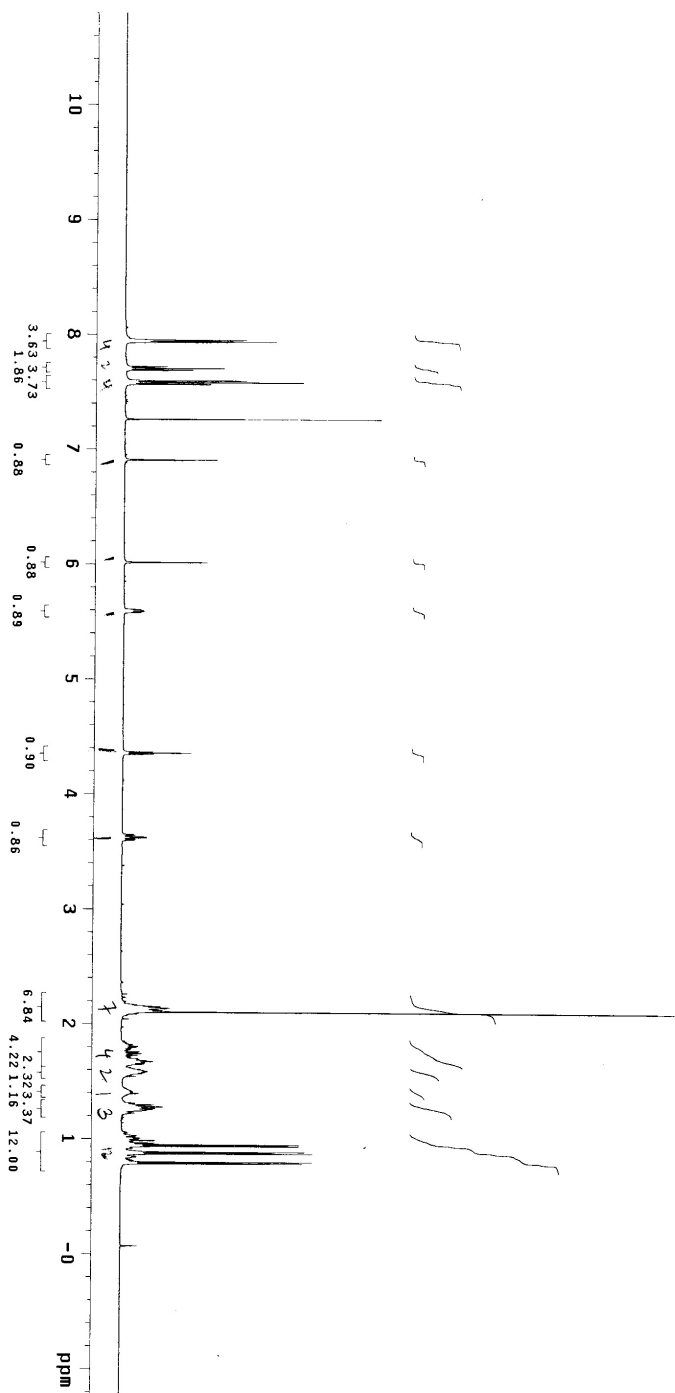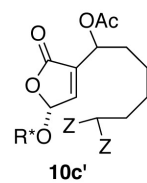

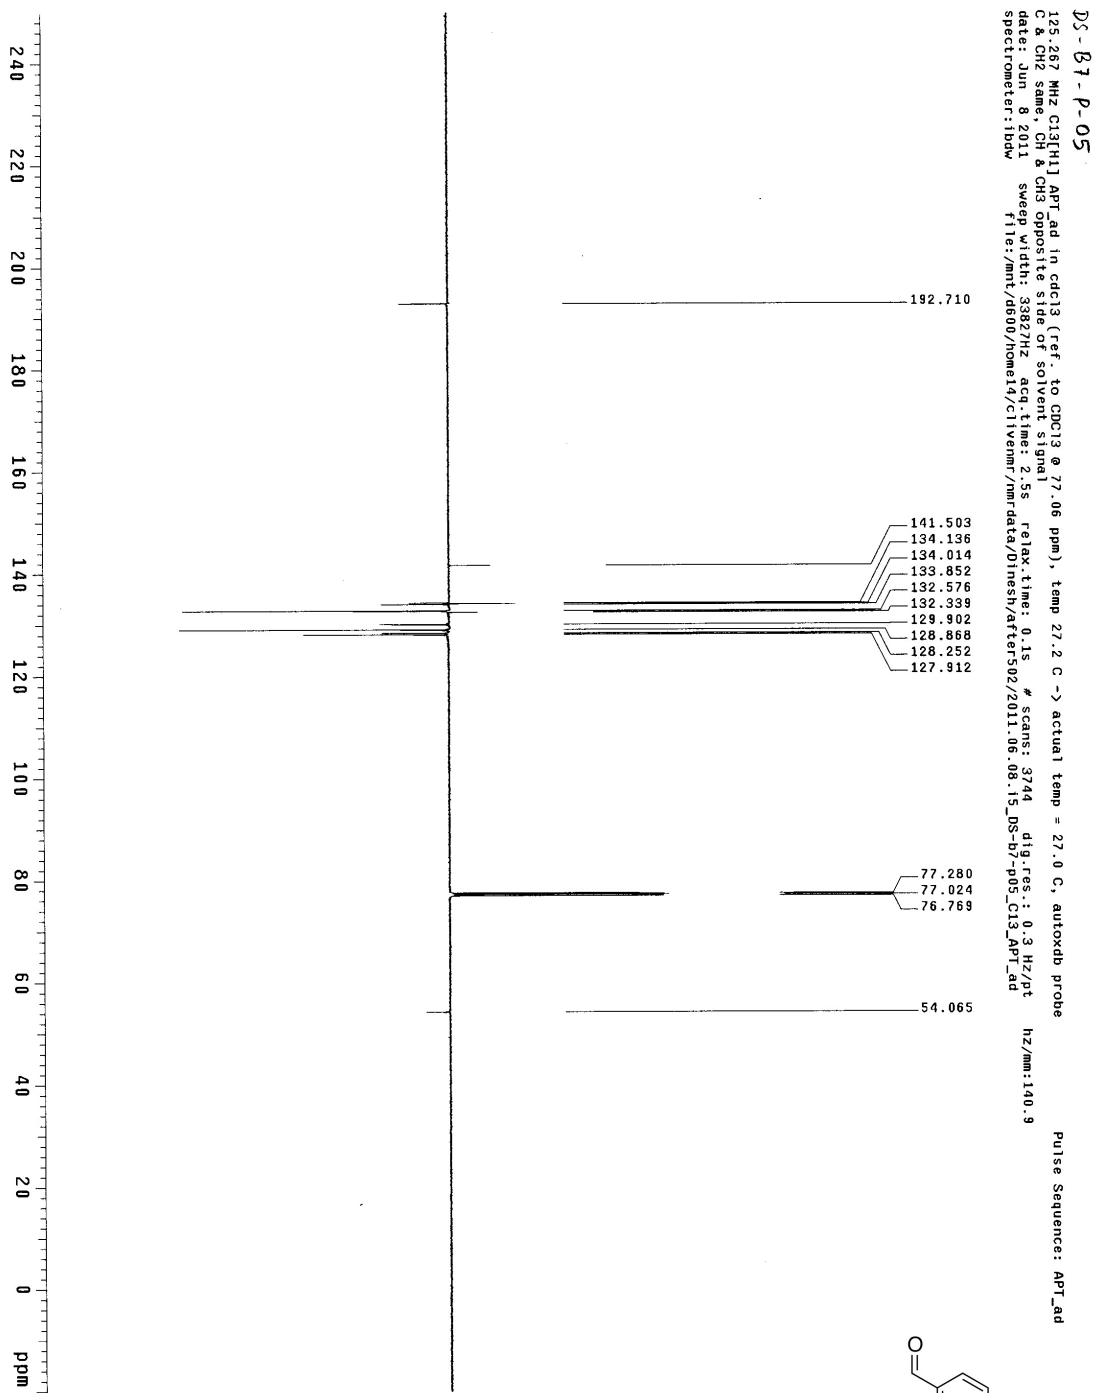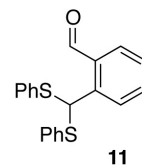



DS-b7-p05  
498.122 MHz H1 1D In cdcl3 (ref. to CDCl3 @ 7.26 ppm), temp 27.2 C -> actual temp = 27.0 C, autoxdo probe

Pulse Sequence: s2pu1

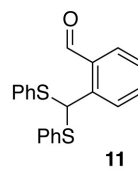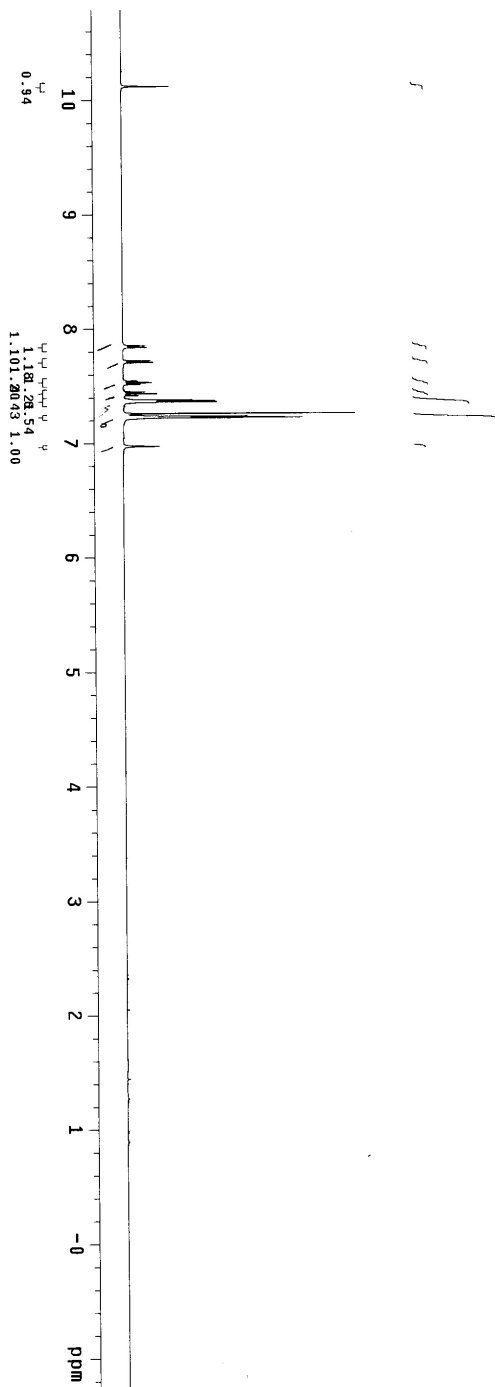

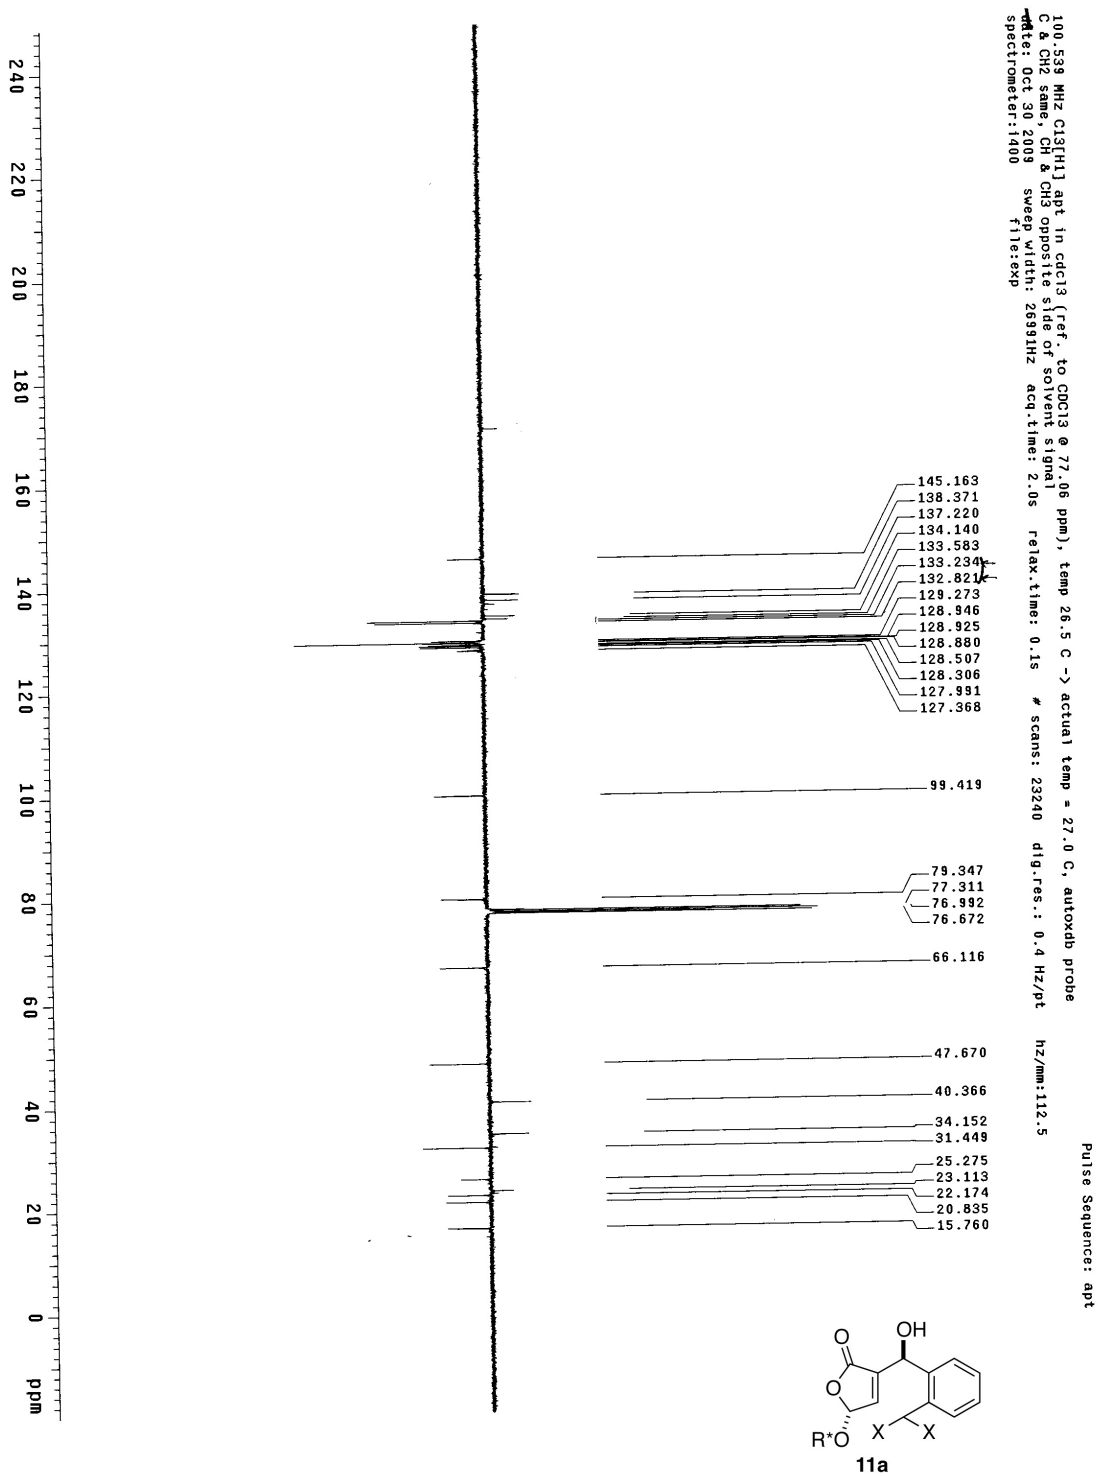

ds-b2-p113  
399.794 MHz <sup>1</sup>H 1D in cdcl3 (ref. to CDCl3 @ 7.26 ppm), temp 26.5 C -> actual temp = 27.0 C, autotxdb probe

Pulse Sequence: szpu1

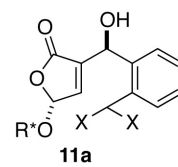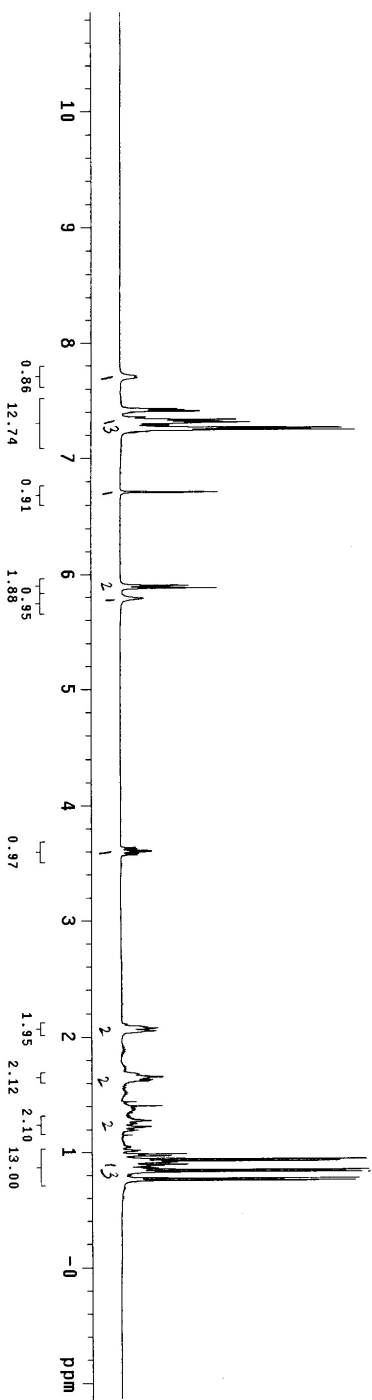

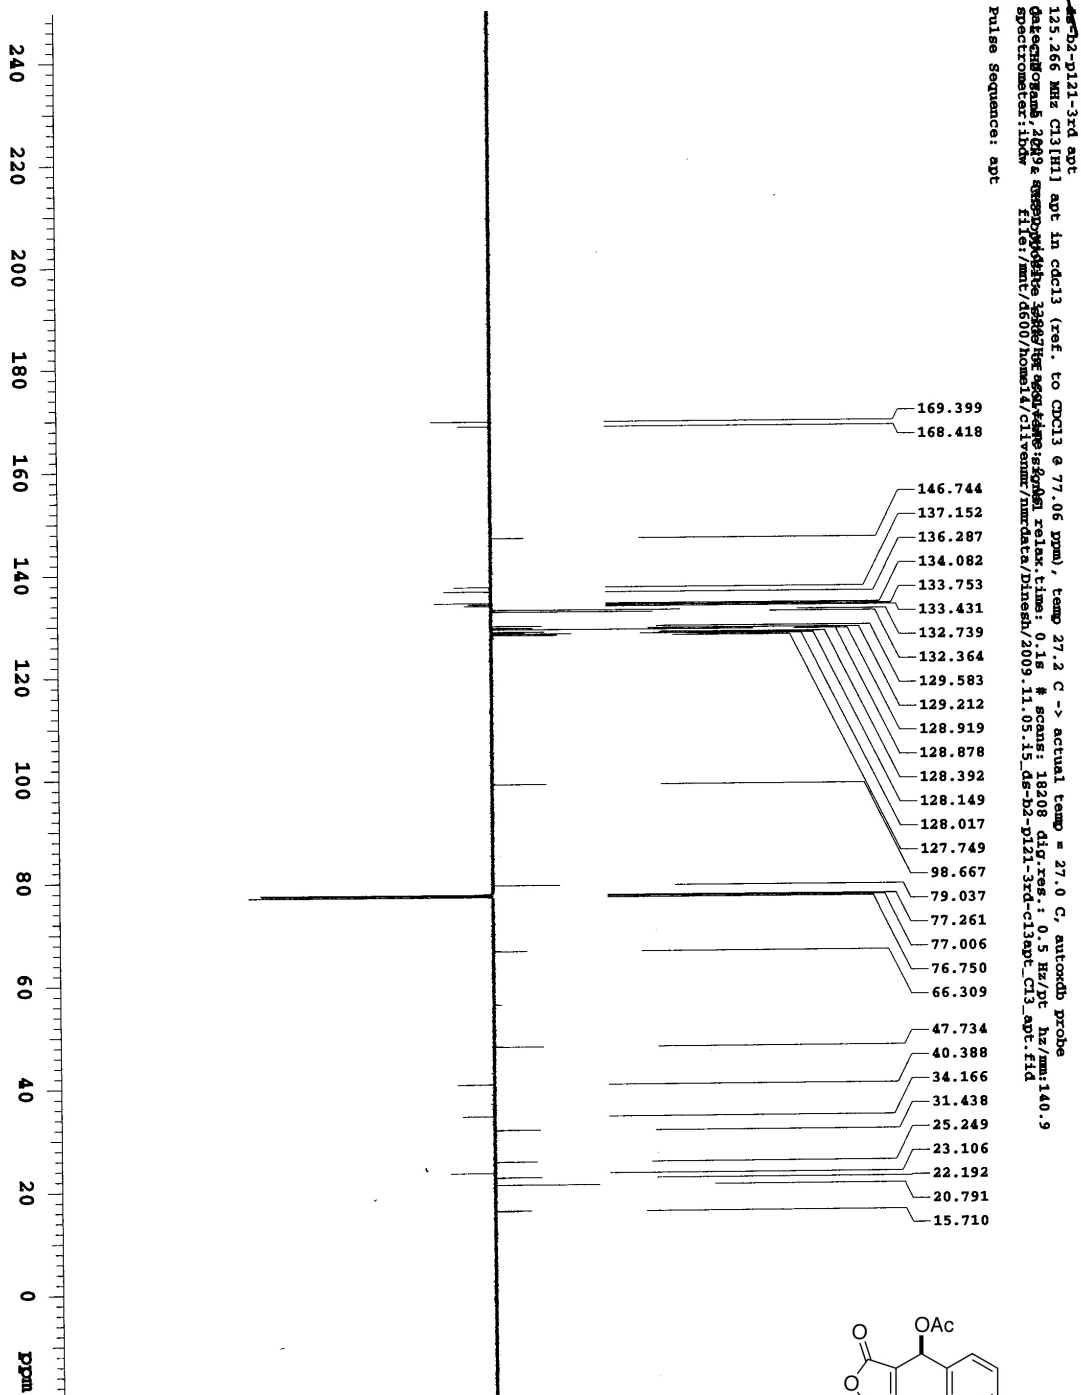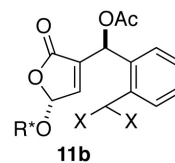

<sup>1</sup>H NMR spectrum of 11b in CDCl<sub>3</sub> (ref. to CDCl<sub>3</sub> @ 7.26 ppm), temp 27.2 °C -> actual temp = 27.0 °C, autoexdp probe

Pulse Sequence: s2pnr1

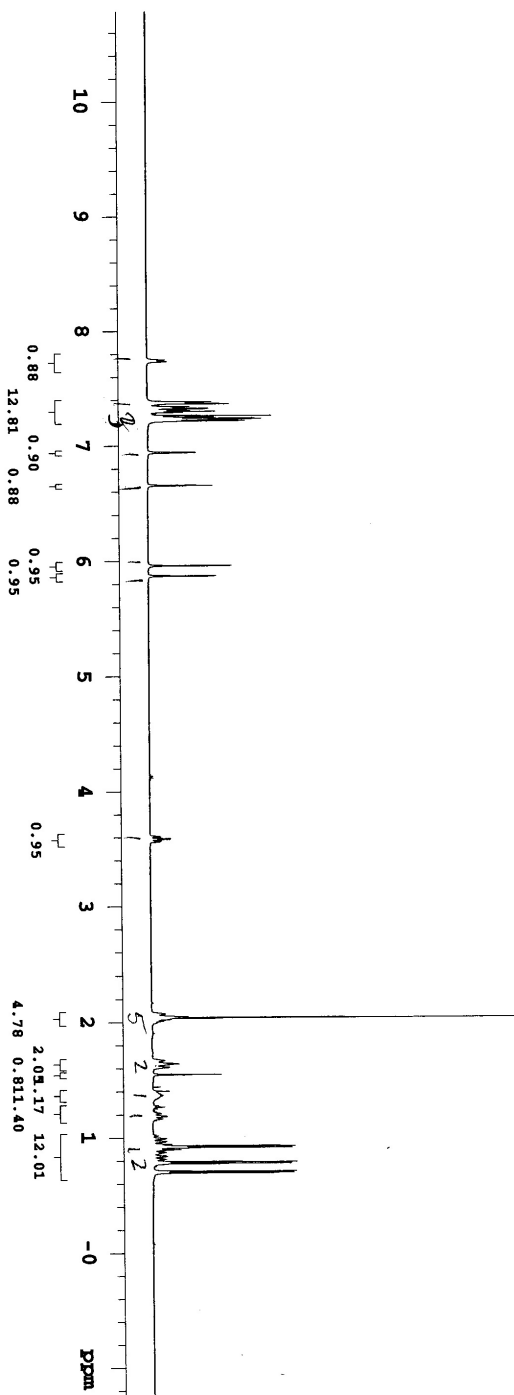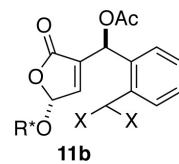

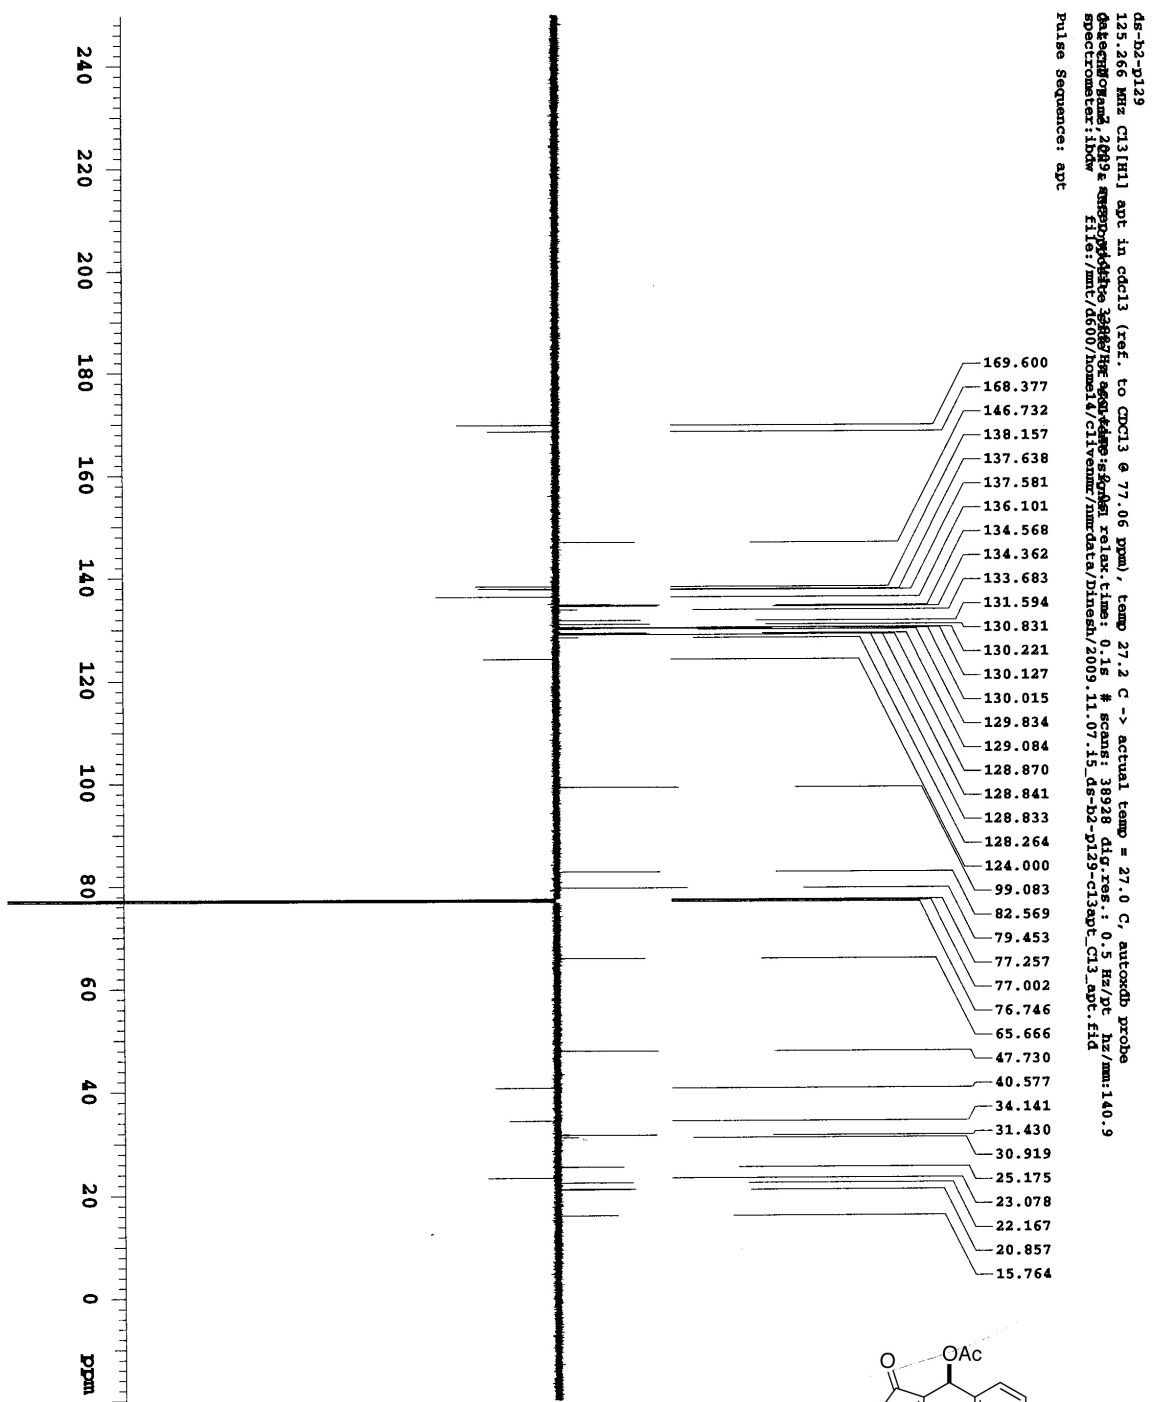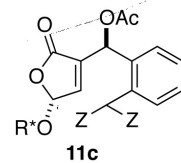

05-b2-129  
498.122 MHz H1 D0 in cdcl3 (ref. to CDCl3 @ 7.26 ppm), temp 27.2 C -> actual temp = 27.0 C, autoxorb probe

Pulse Sequence: s2pu1

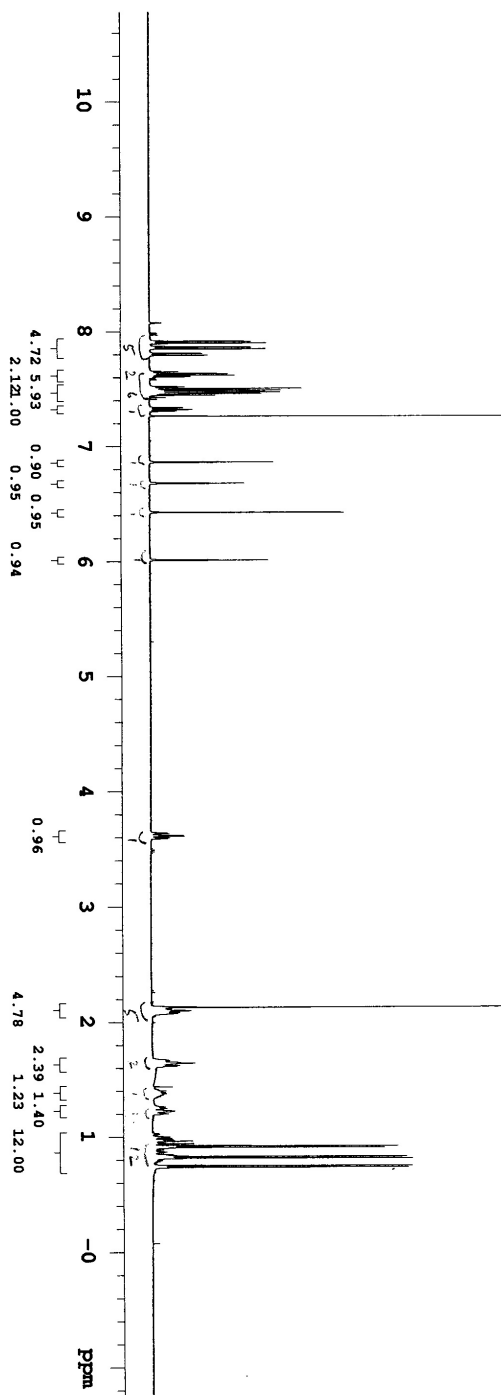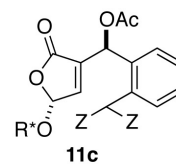

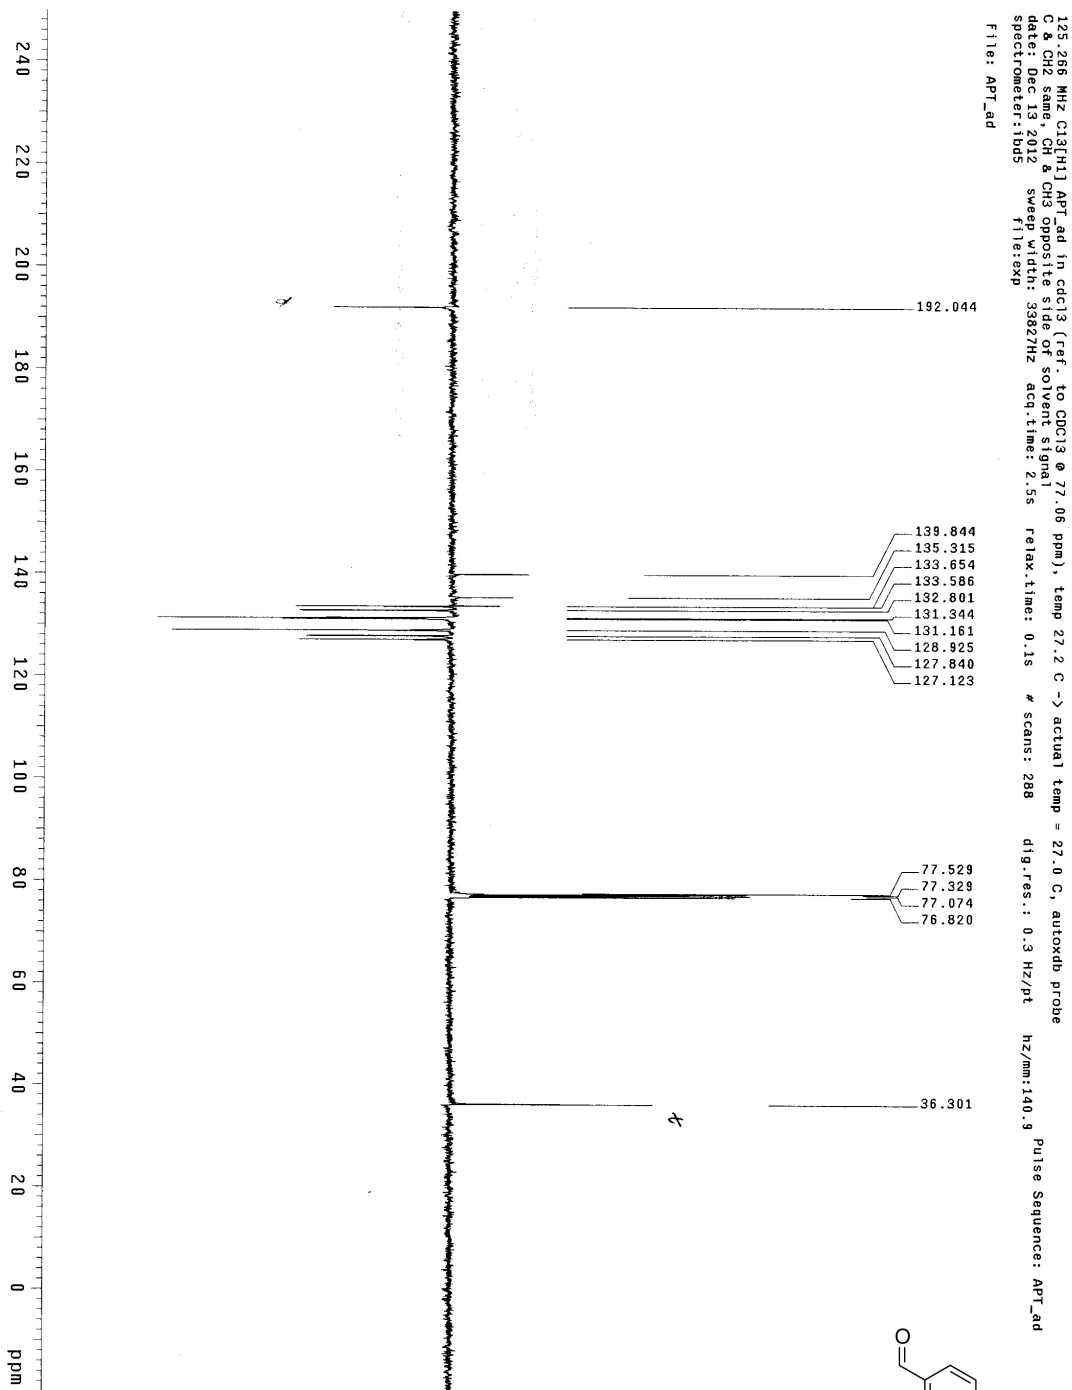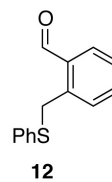



05-21

DS-B5-p121-a1d  
399.794 MHz H1 1D 1h cdcl3 (ref. to CDCl3 @ 7.26 ppm), temp 27.0 C -> actual temp = 27.0 C, autotxdr probe  
File: PROTON

Pulse Sequence: szpu1

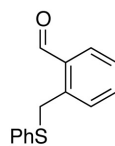

12

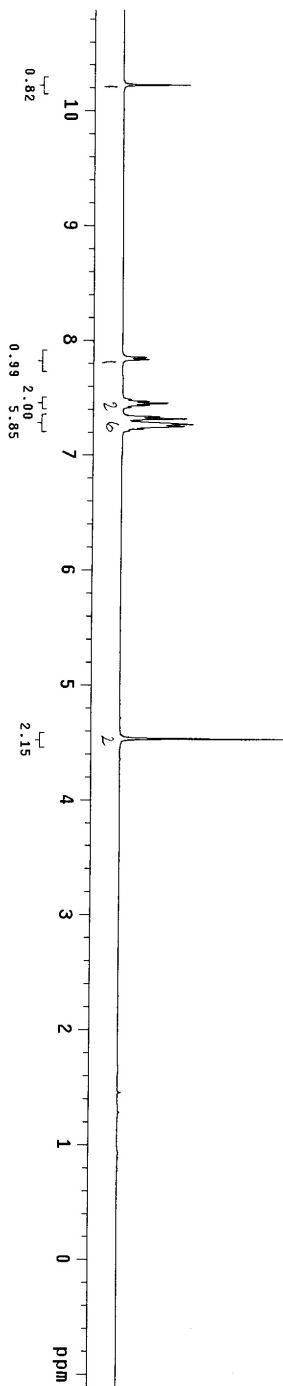

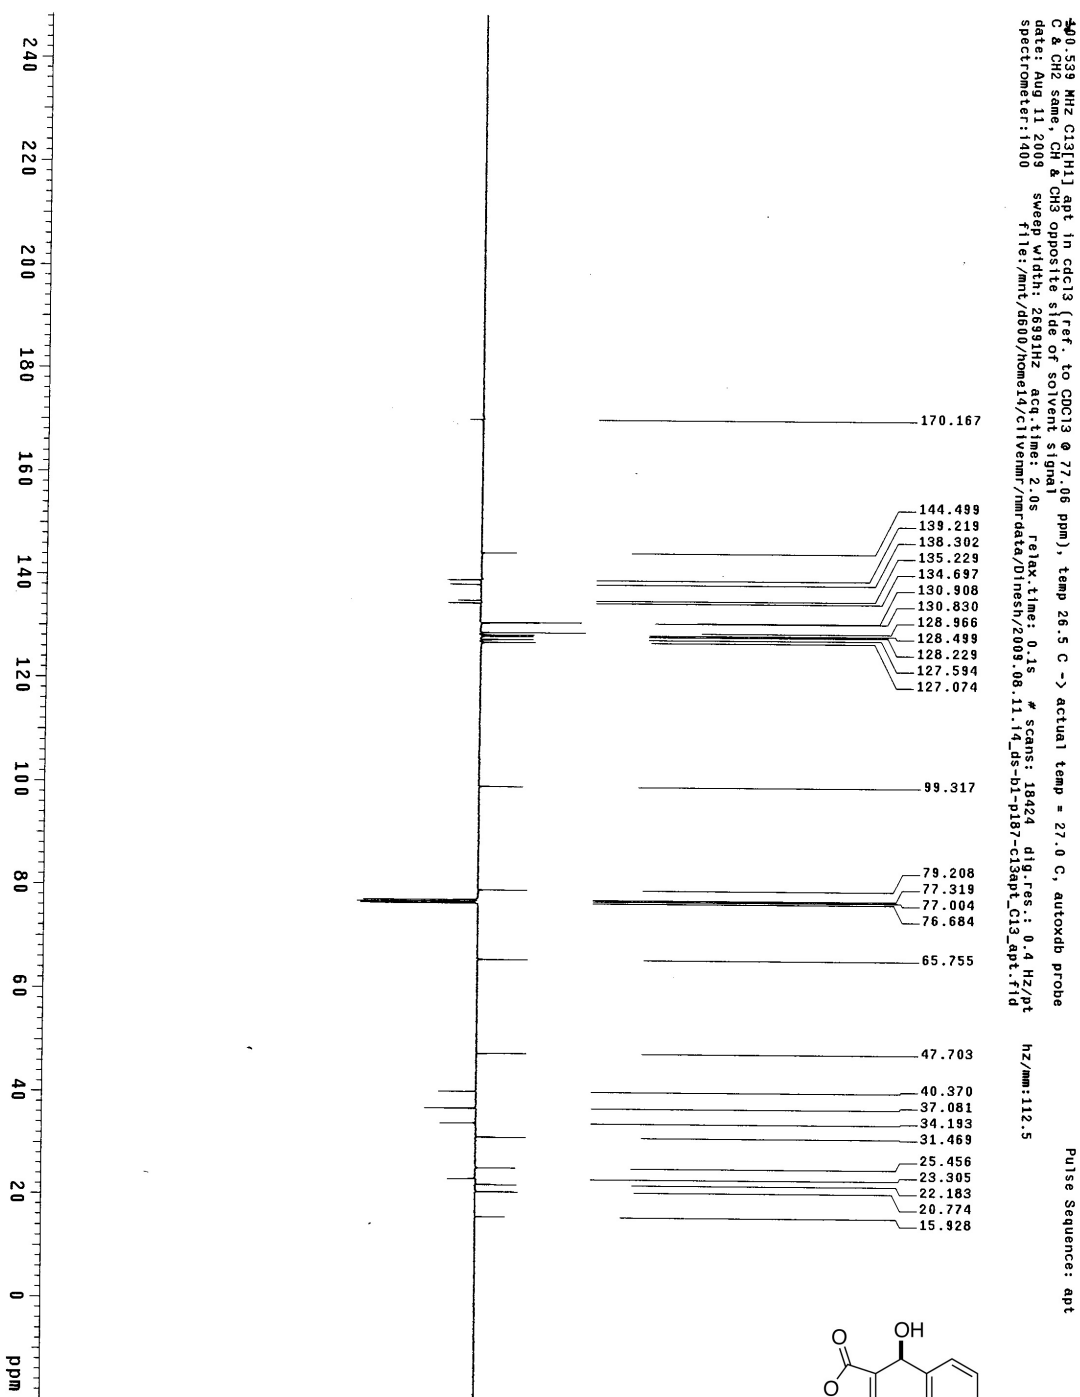

ds-b1-p187-f1-28  
399.794 MHz H<sub>1</sub> 1D in cdcl3 (ref. to CDCl<sub>3</sub> @ 7.26 ppm), temp 26.5 C -> actual temp = 27.0 C, autokwd probe

Pulse Sequence: s2pu1

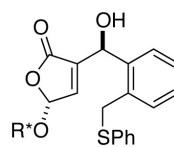

12a

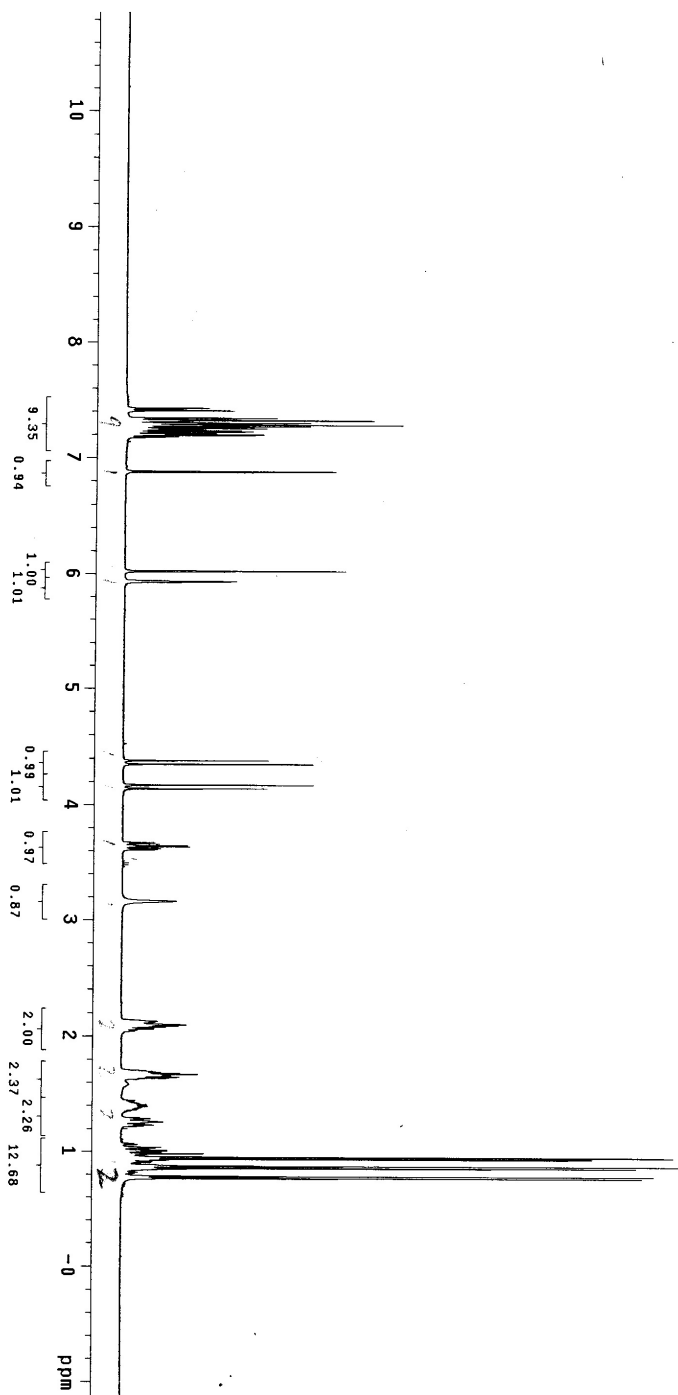

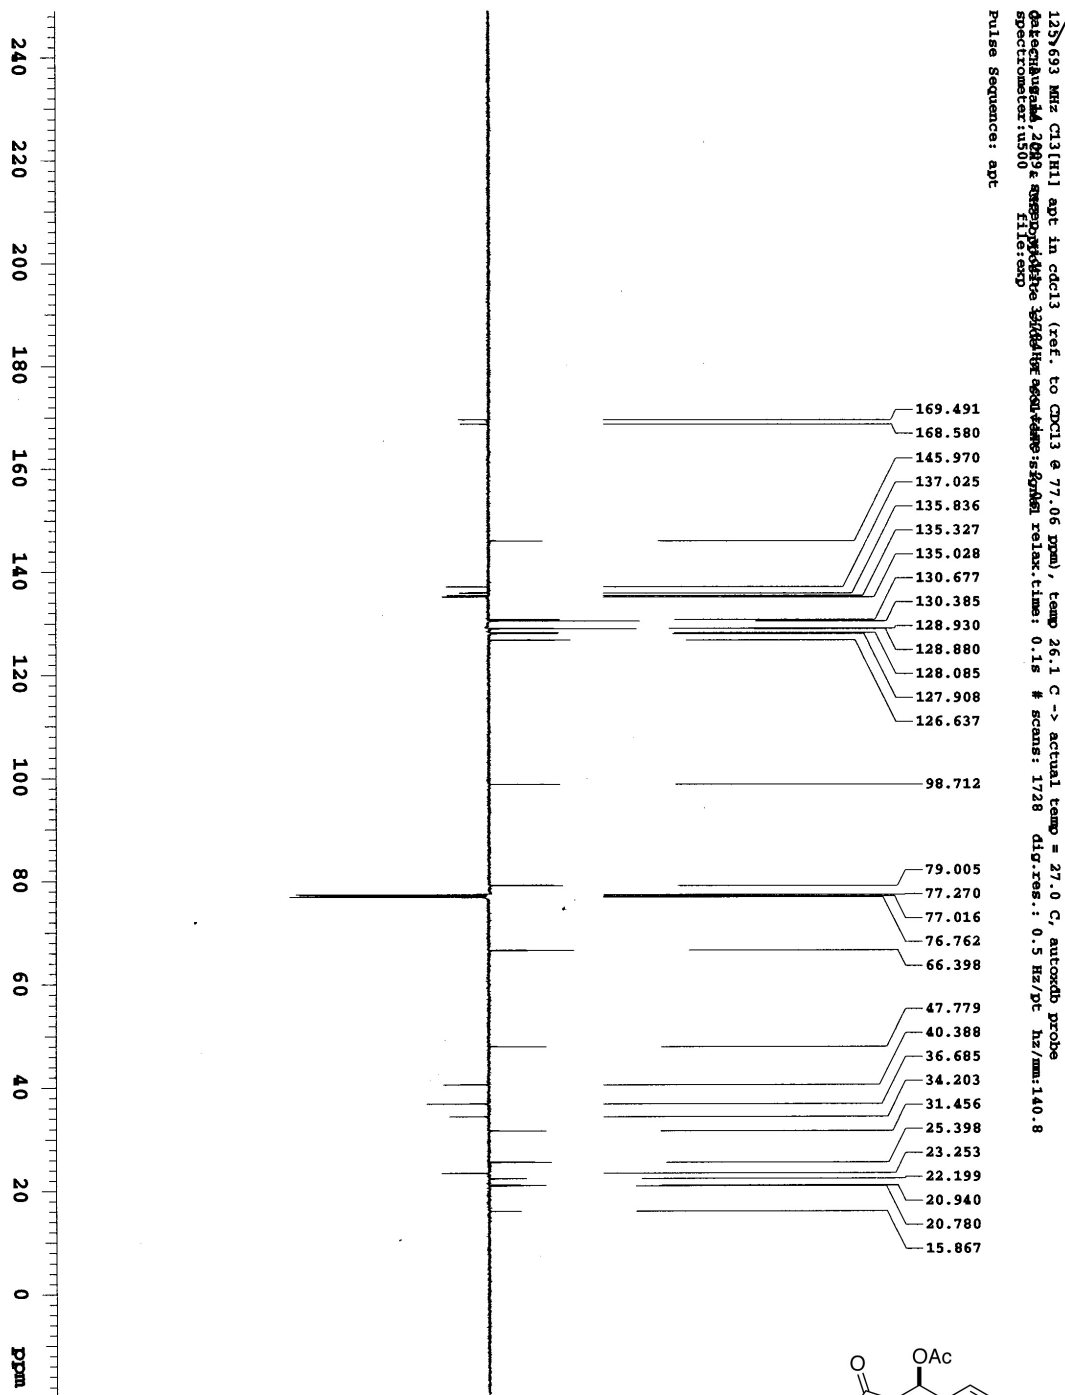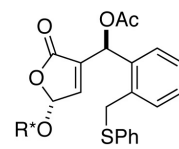

12b

4g-b1-p197-acylation  
499.821 MHz H1 ID in cdcl3 (ref. to CDCl3 @ 7.26 ppm), temp 26.1 C -> actual temp = 27.0 C, autoexdp probe  
Pulse Sequence: s2pul

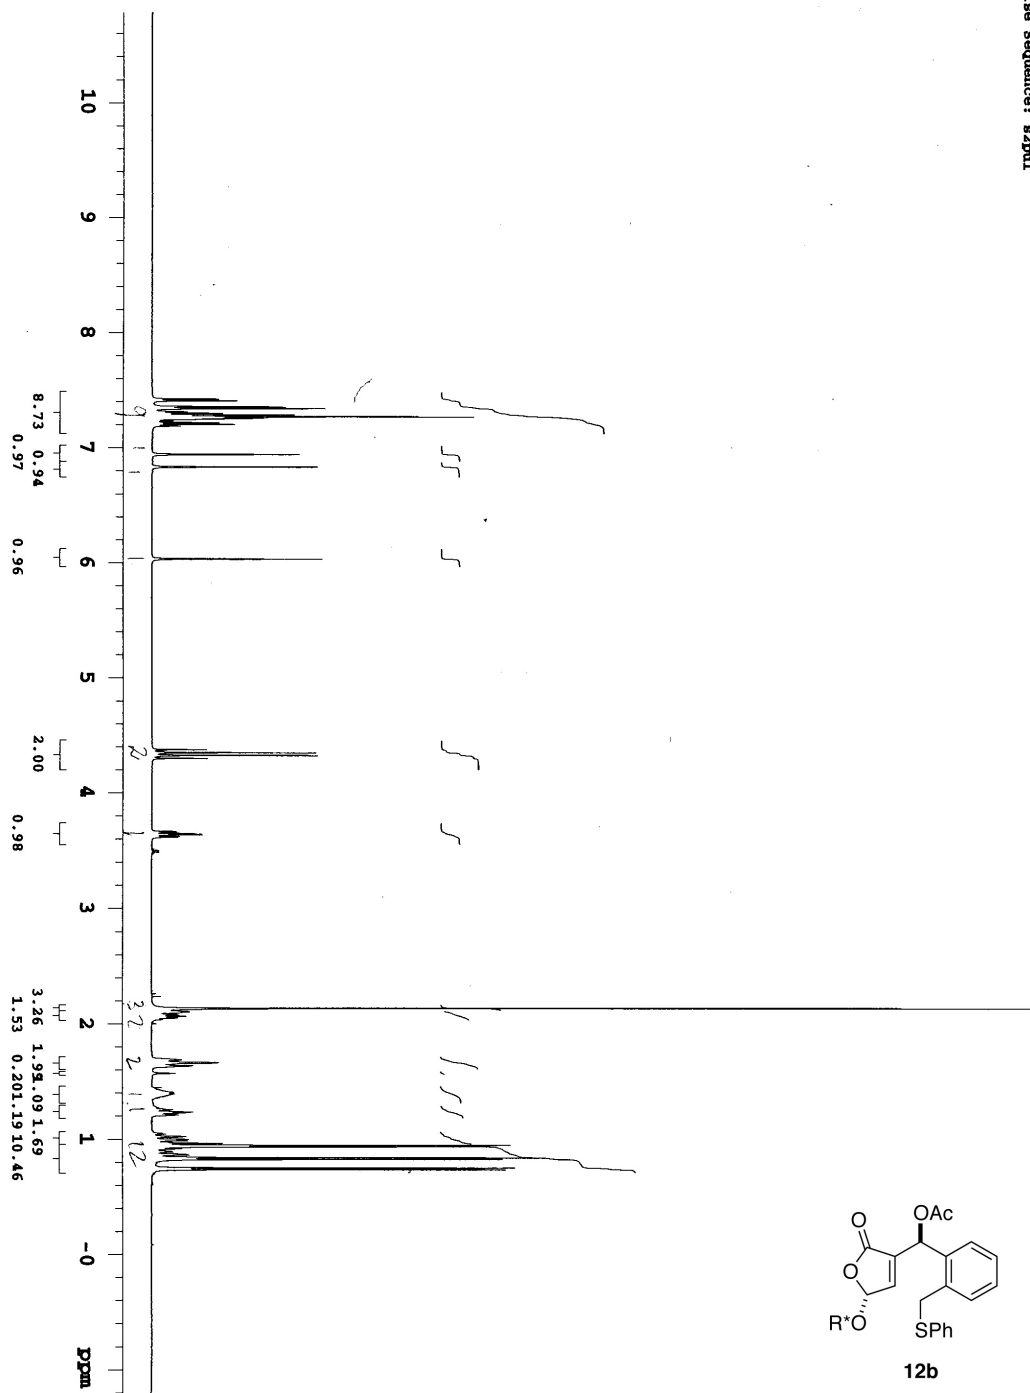

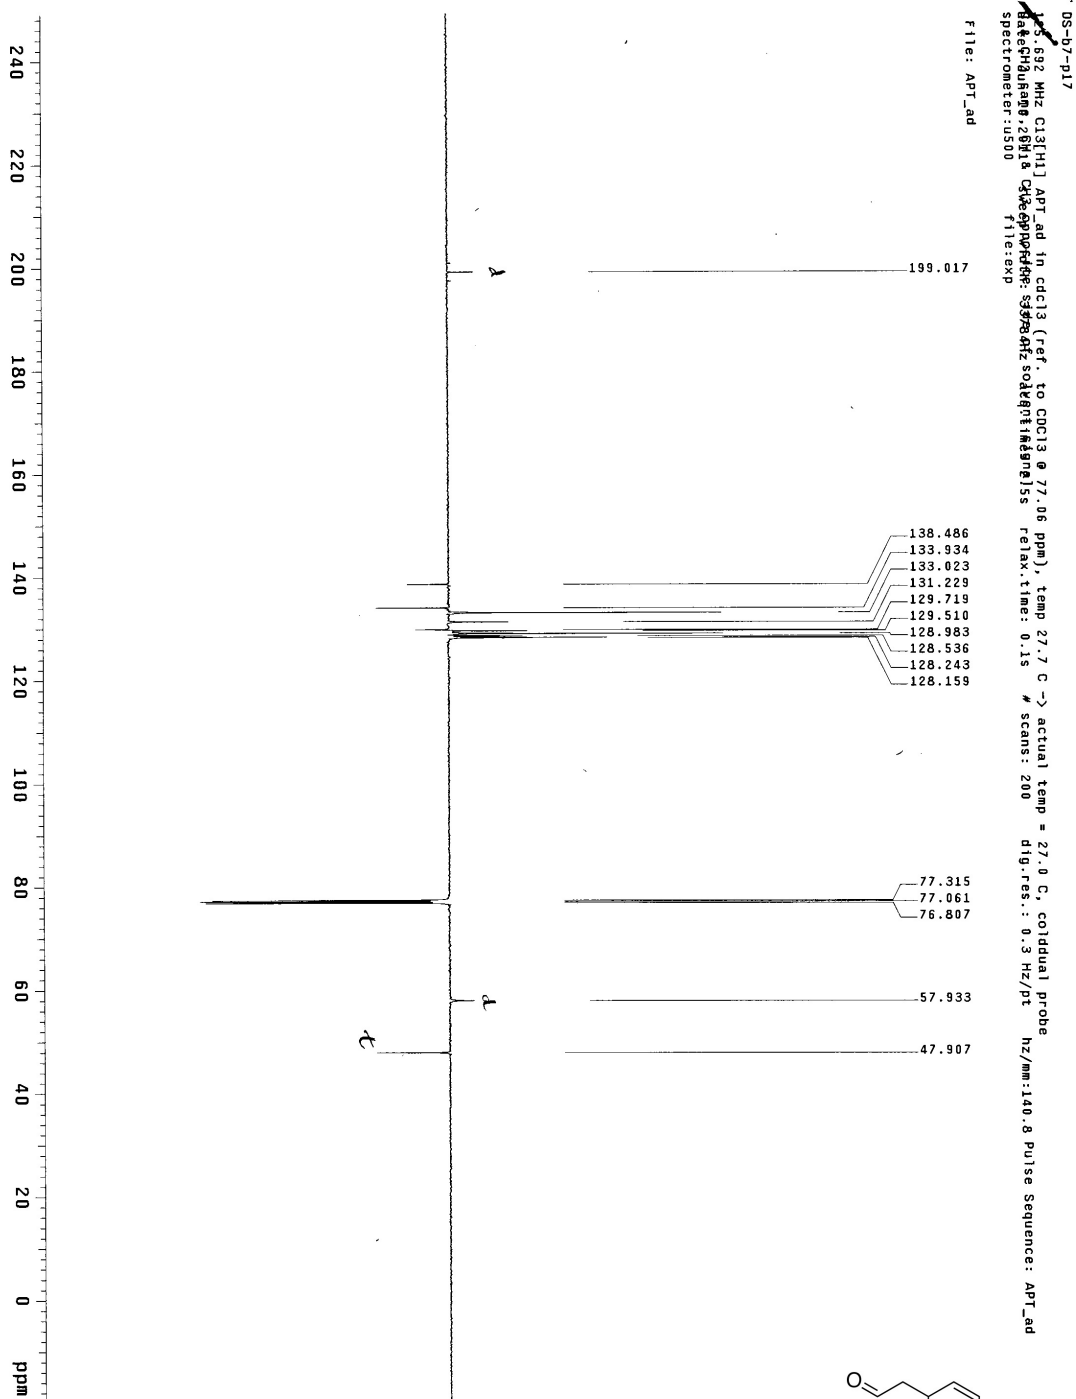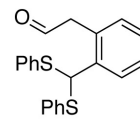

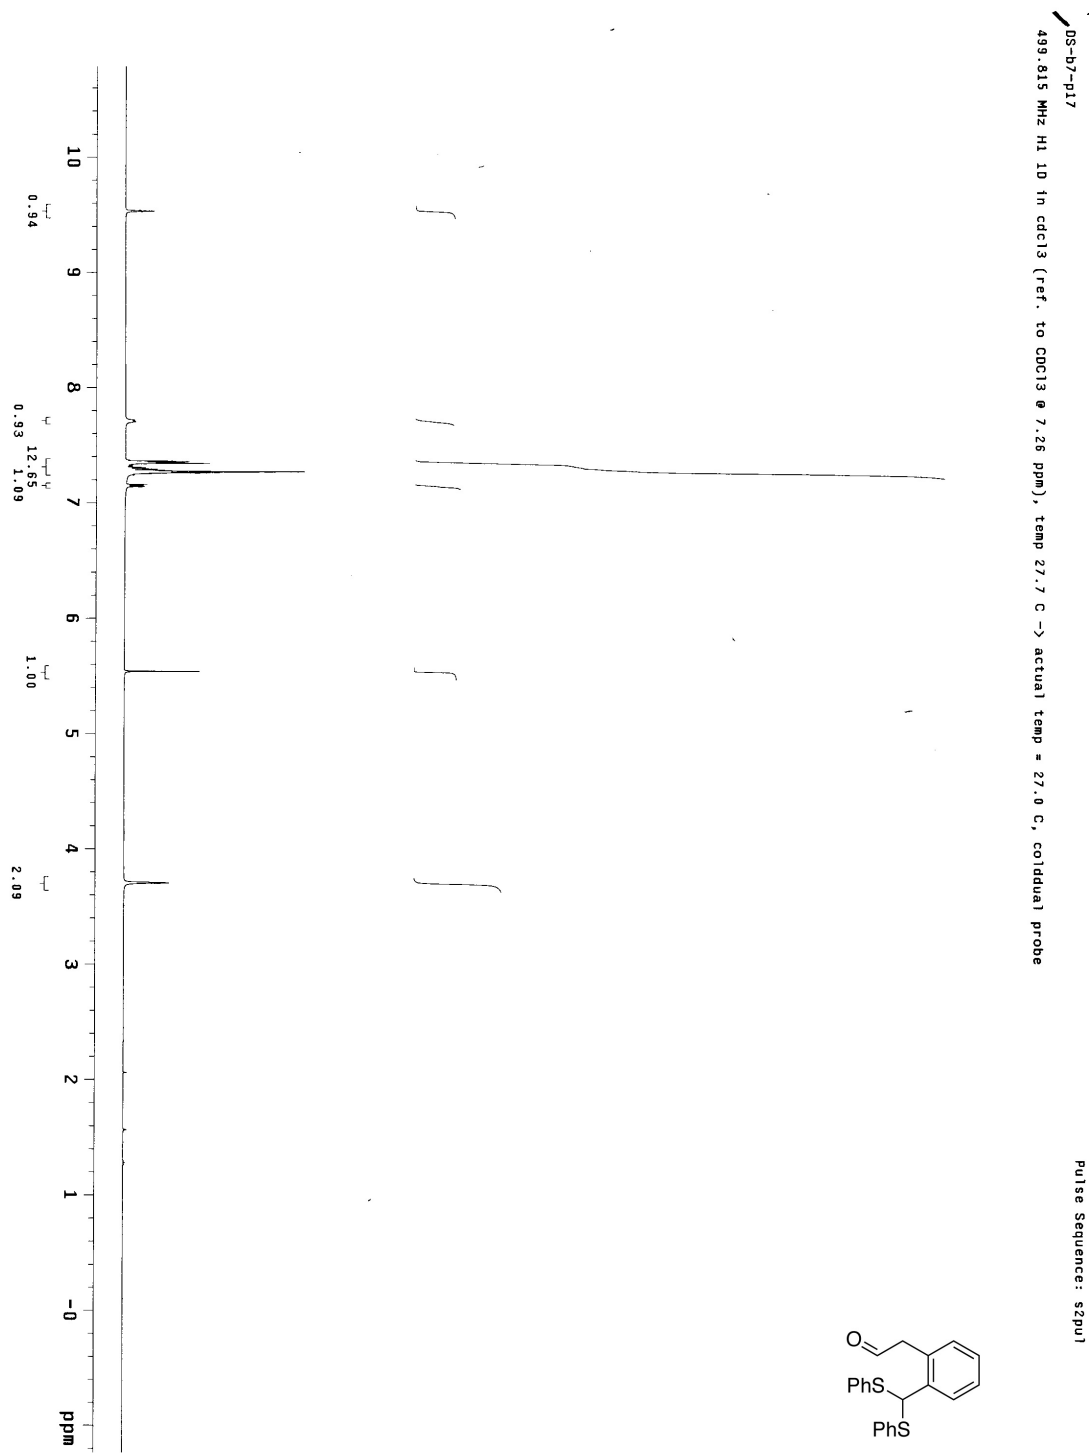

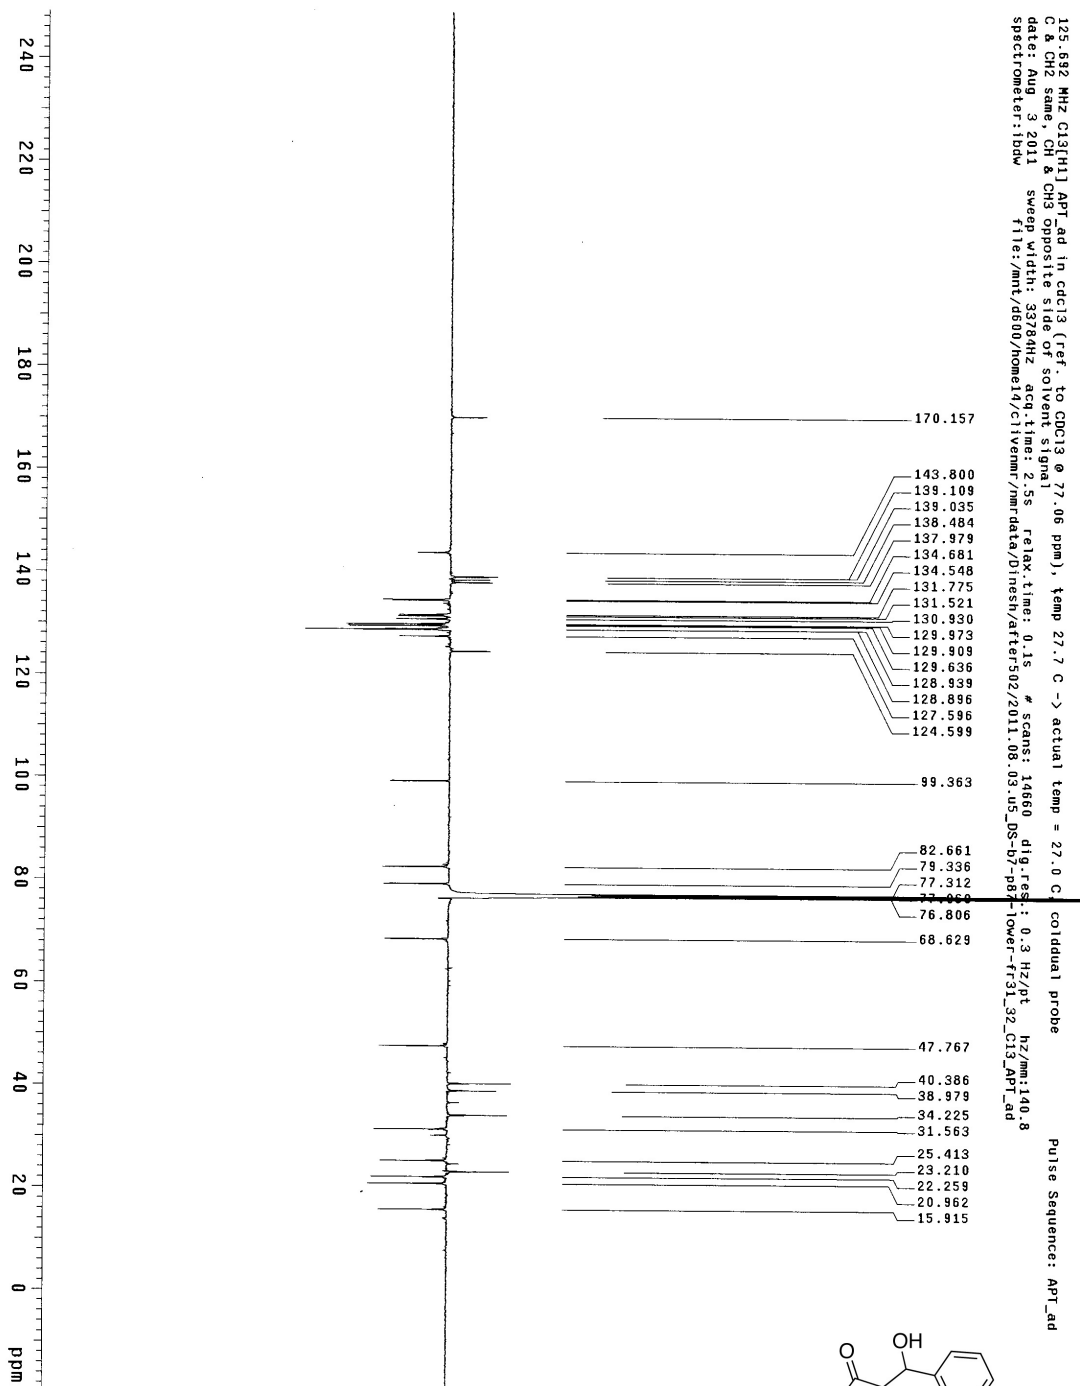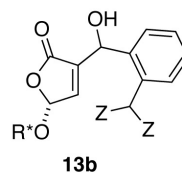



DS-b7-p87-fr29-32-10wvfr  
499.815 MHz H1 1D In cdcl3 (ref. to CDCl3 @ 7.26 ppm), temp 27.7 C -> actual temp = 27.0 C, coil(dua) probe

Pulse Sequence: szpu1

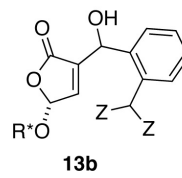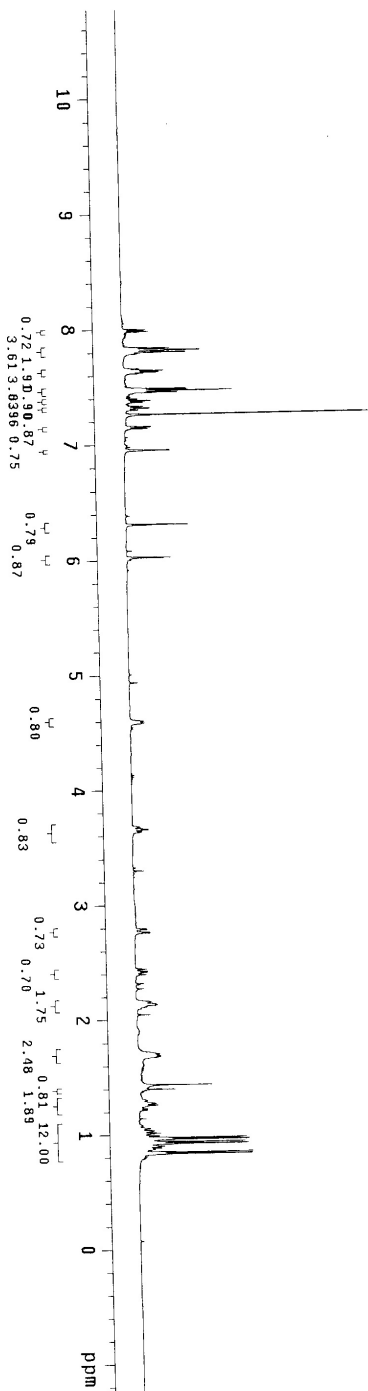

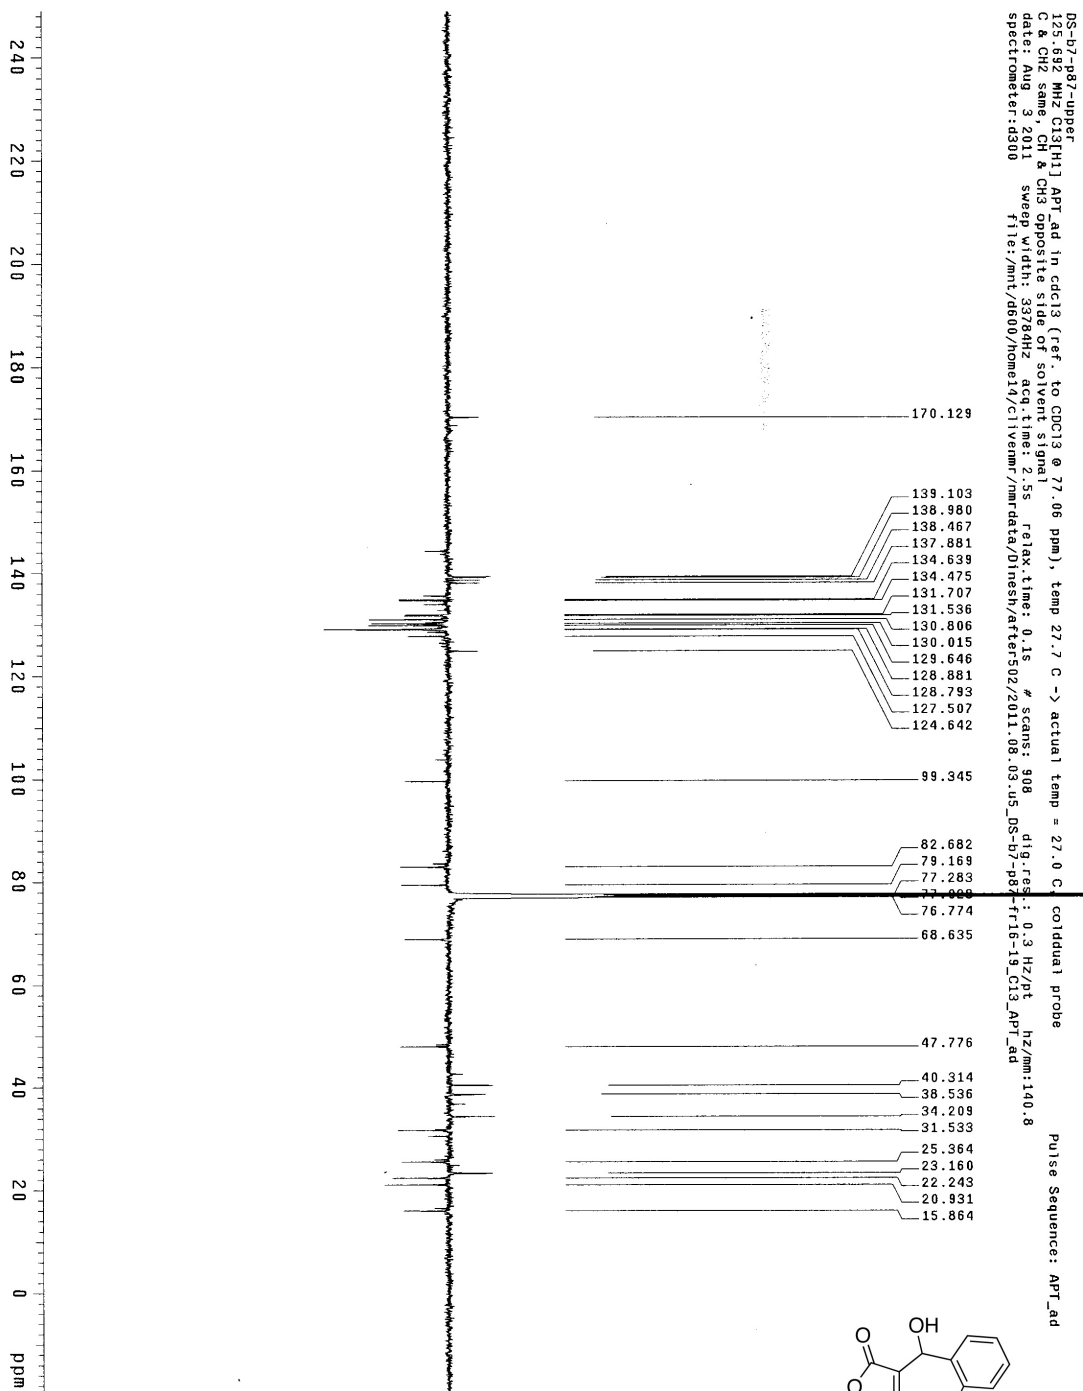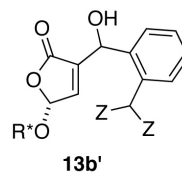

DS-h7-p87-upper-f16\_19  
499.815 MHz H1 1D 1h cdcl3 (ref. to CDCl3 @ 7.26 ppm), temp 27.7 C -> actual temp = 27.0 C, cotidual probe

Pulse Sequence: s2pul

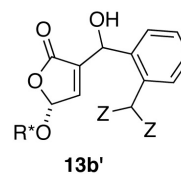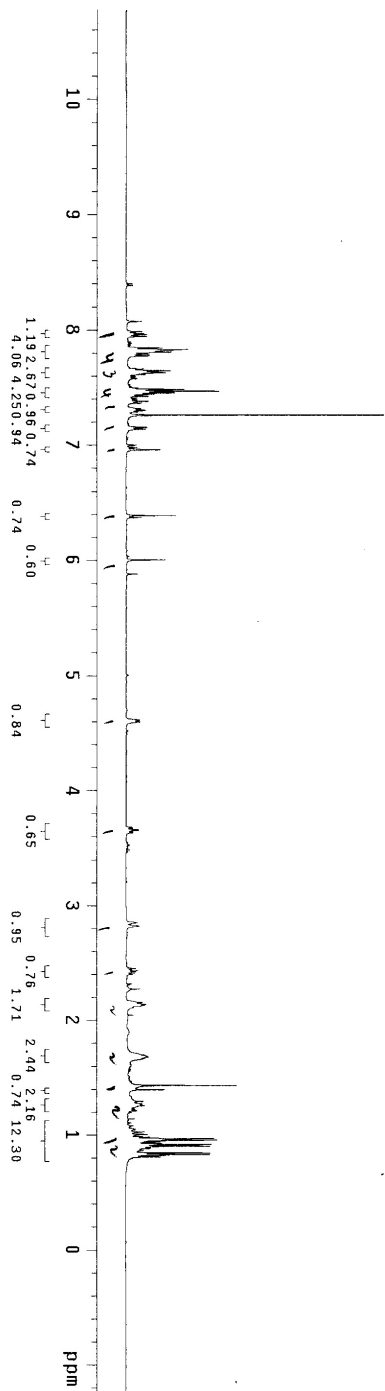

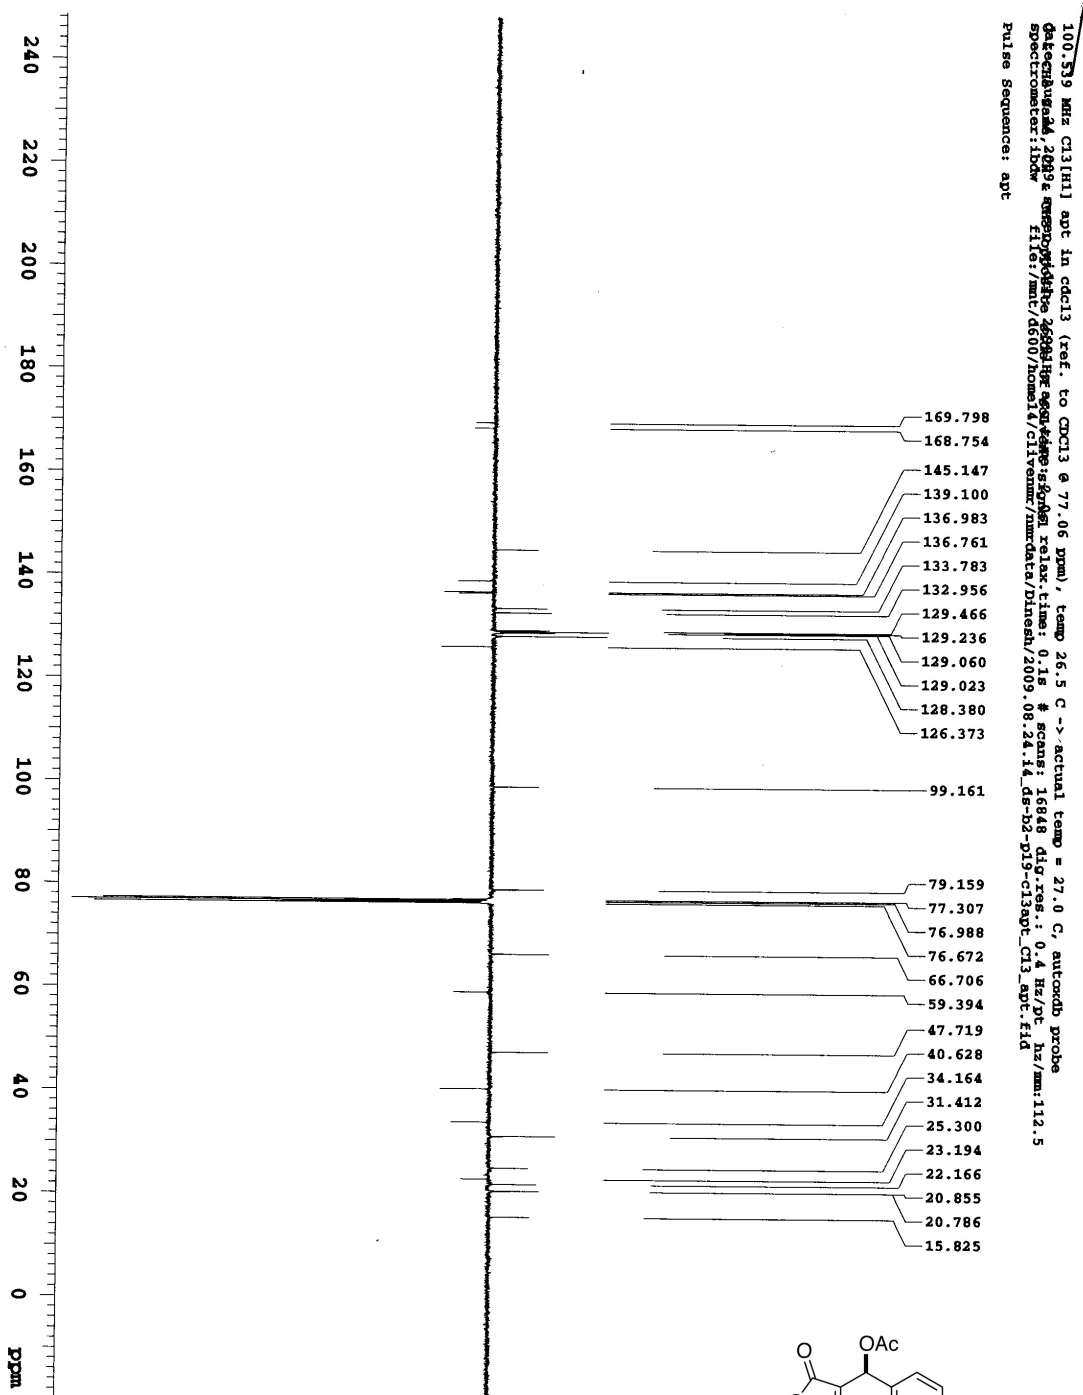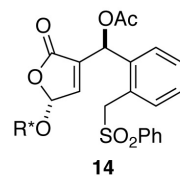

ds-12-119  
-244.794 MHz <sup>1</sup>H 1D in cdcl3 (ref. to CDCl3 @ 7.26 ppm), temp 26.5 C -> actual temp = 27.0 C, autotxdr probe

Pulse Sequence: s2pul1

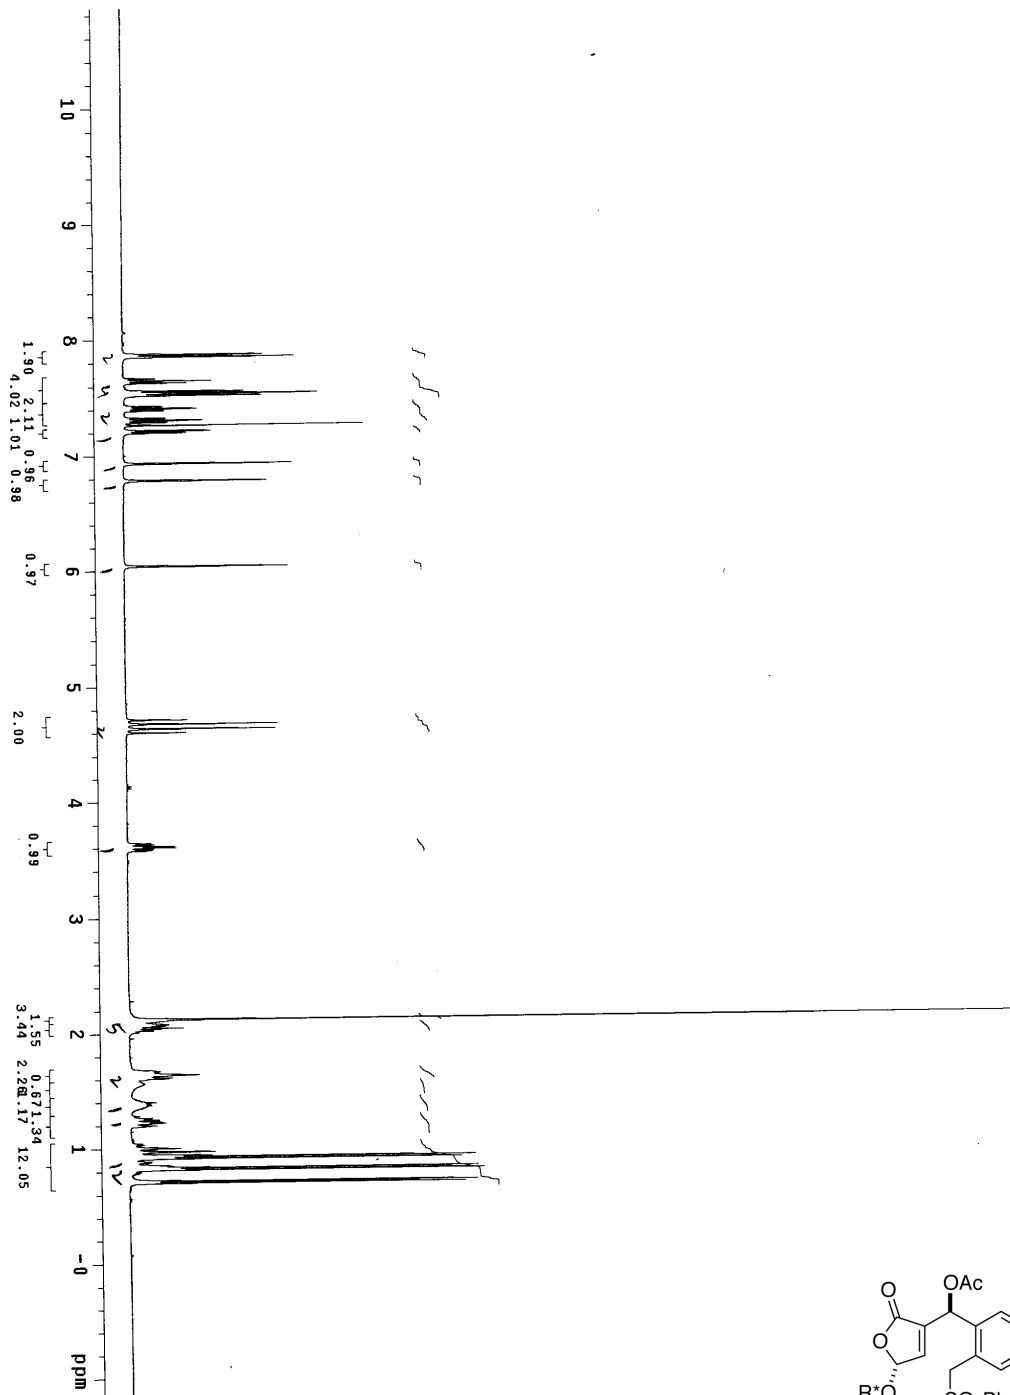

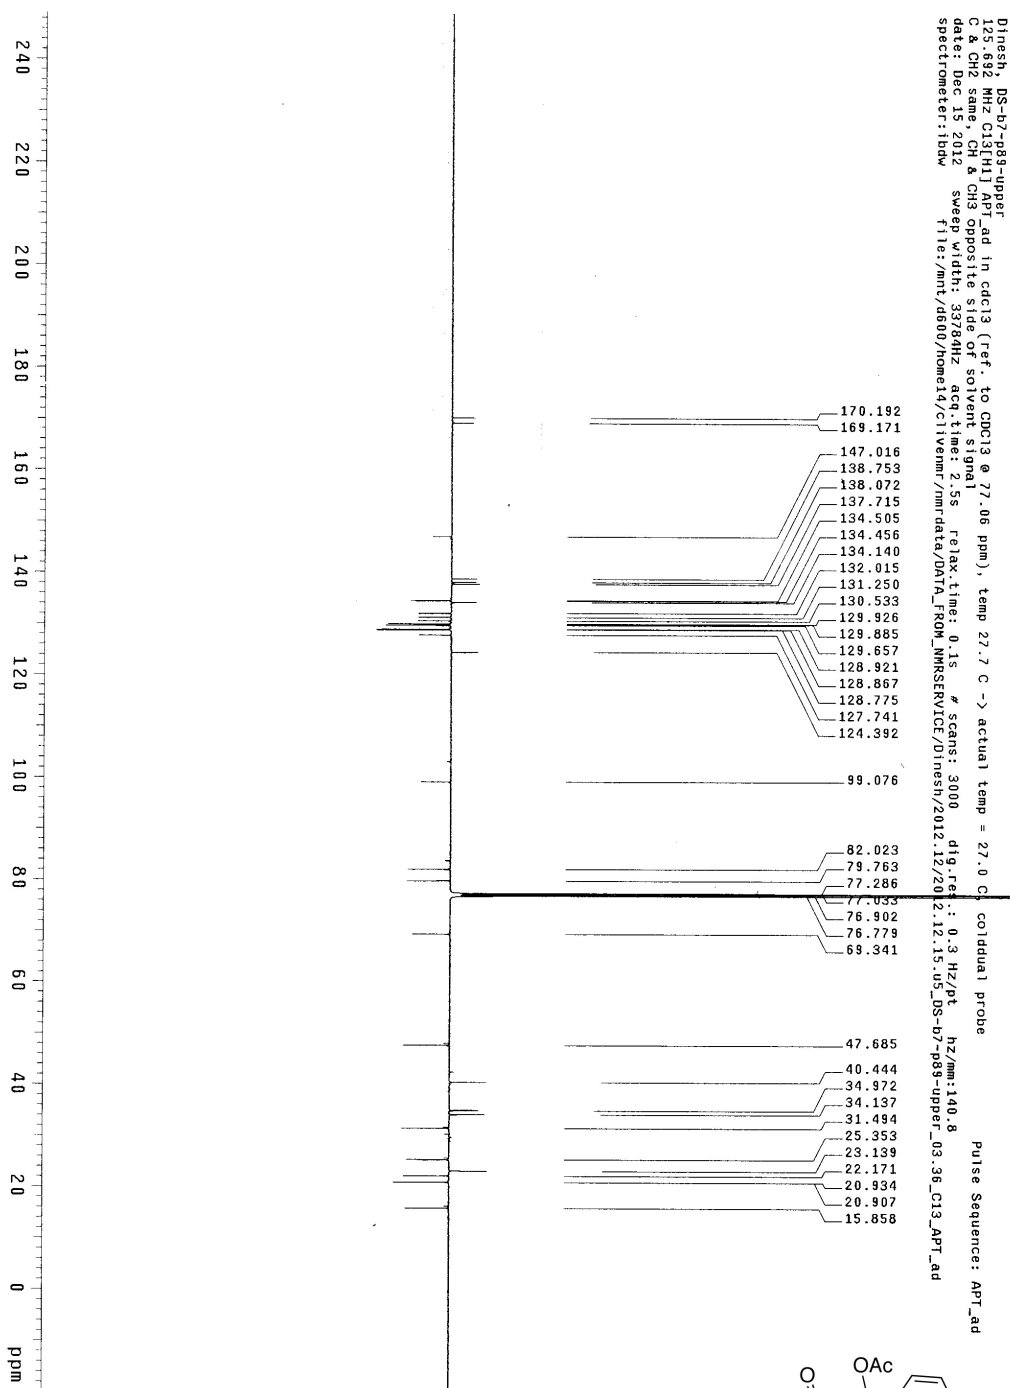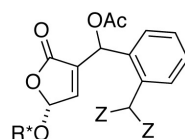

15 less polar isomer

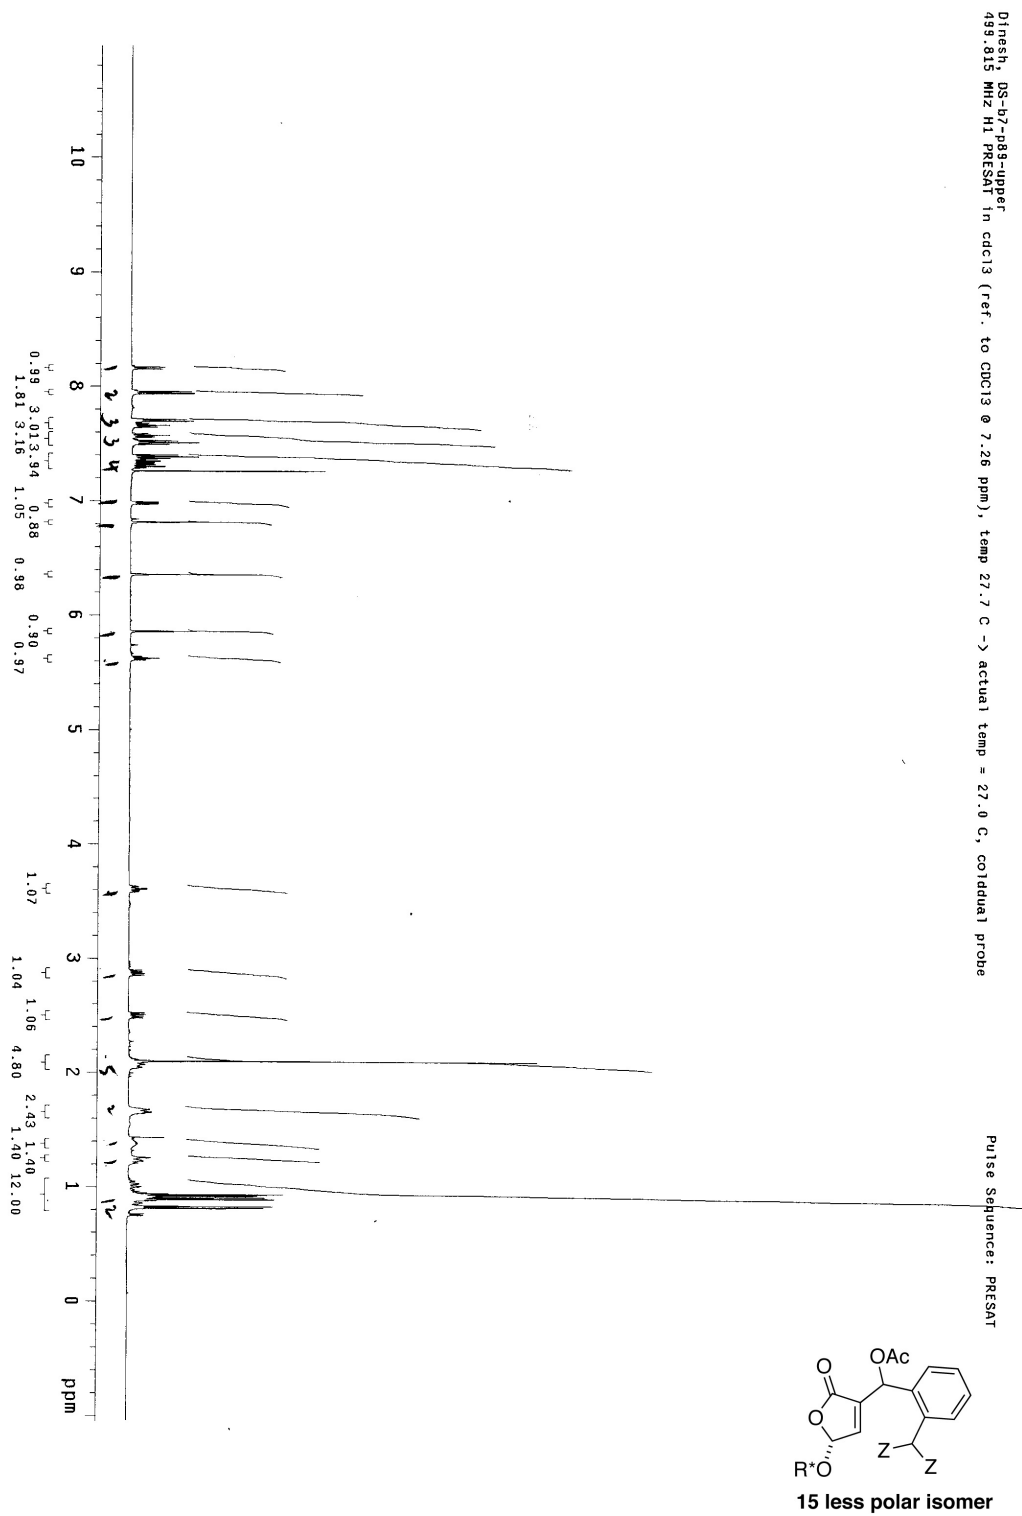

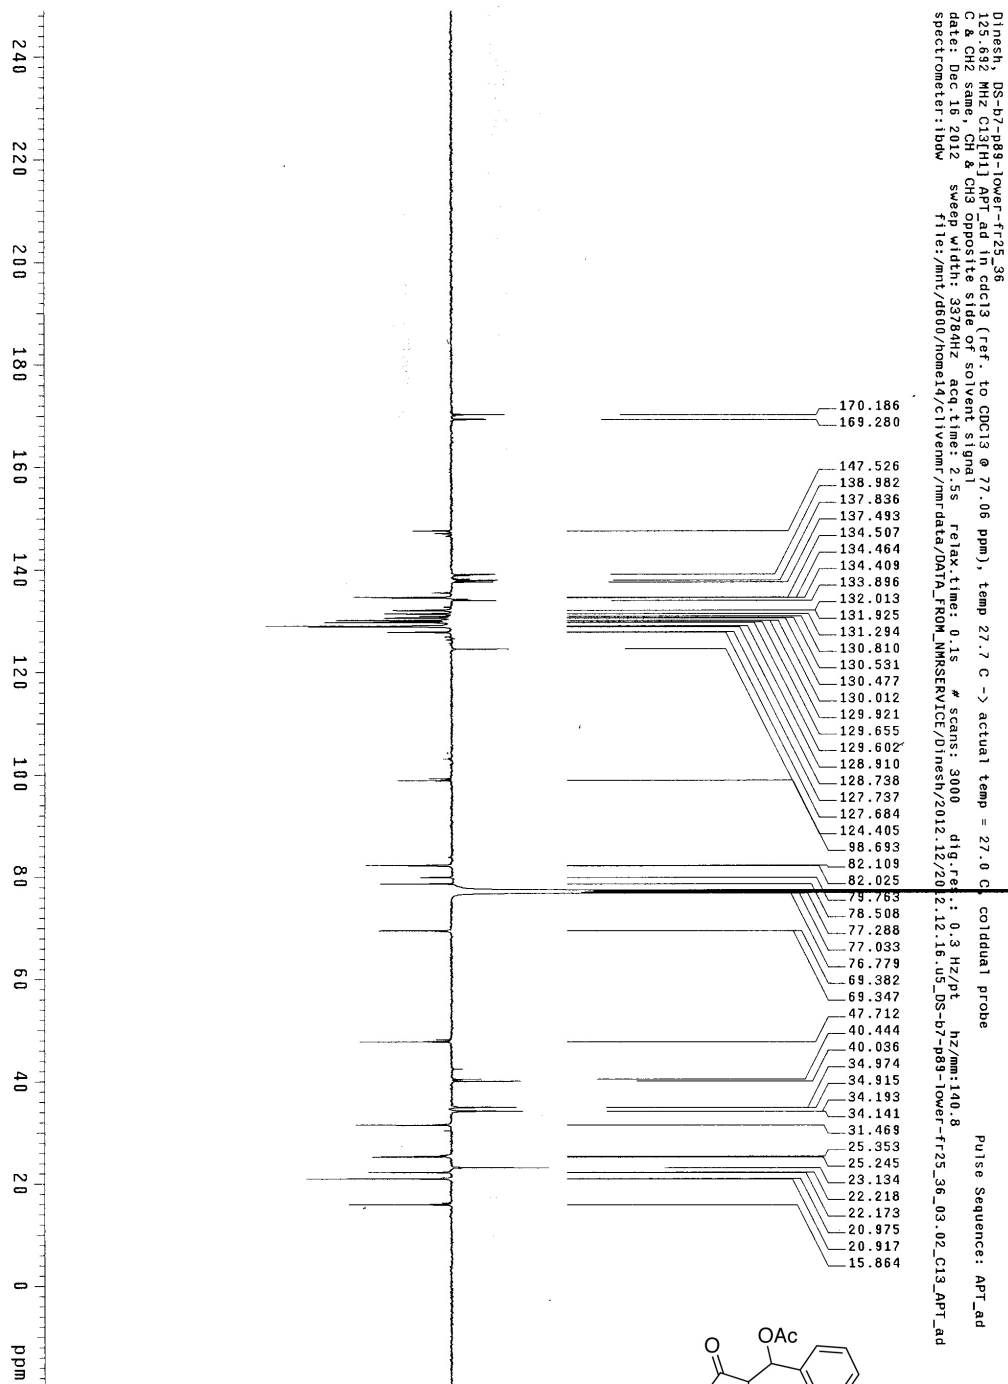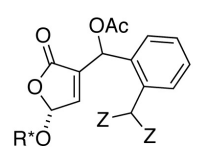

15 mixture of isomers



DS-b7-p89-lower-fr25-36  
498.118 MHz T1 10 in cdcl3 (ref. to CDCl3 @ 7.26 ppm), temp 27.2 C -> actual temp = 27.0 C, autoxddd probe

File: PROTON

Pulse Sequence: szpu1

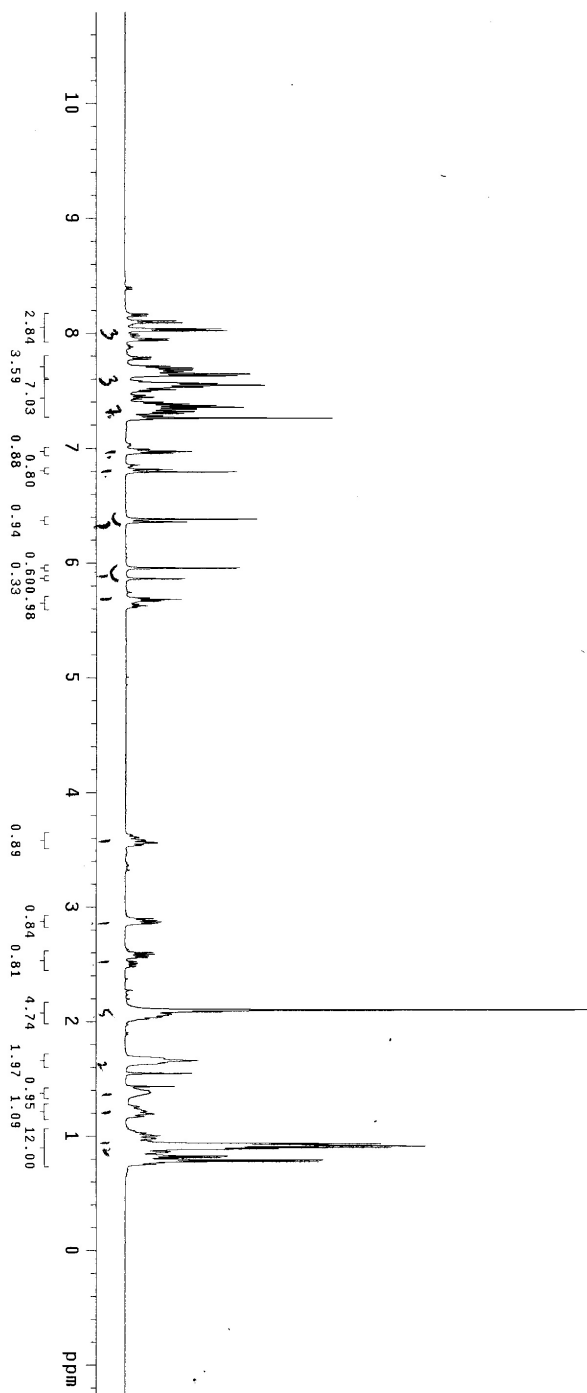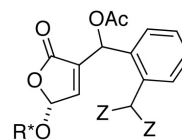

15 mixture of isomers
